# Supplementary material for: Effects of photosymbiosis and related processes on planktic foraminifera-bound nitrogen isotopes in South Atlantic sediments
Source: Copernicus journal article supplement (doi:10.5194/egusphere-2024-2291), 2024-07-31
Supplement: Supplementary file [file egusphere-2024-2291-RC1-supplement.pdf]

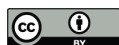

# Effects of photosymbiosis and related processes on planktic foraminifera-bound nitrogen isotopes in South Atlantic sediments

Alexandra Auderset<sup>1,2</sup>, Sandi M. Smart<sup>3</sup>, Yeongjun Ryu<sup>4</sup>, Dario Marconi<sup>4</sup>, Haojia Abby Ren<sup>5</sup>, Lena Heins<sup>2</sup>, Hubert Vonhof<sup>2</sup>, Ralf Schiebel<sup>2</sup>, Janne Repschläger<sup>2</sup>, Daniel M. Sigman<sup>4</sup>, Gerald H. Haug<sup>2</sup> and Alfredo Martínez-García<sup>2</sup>

<sup>1</sup>School of Ocean and Earth Science, University of Southampton, Southampton, SO14 3ZH, UK

<sup>2</sup>Climate Geochemistry Department, Max Planck Institute for Chemistry Mainz, Mainz, 55128, Germany

<sup>3</sup>Department of Geological Sciences, University of Alabama, Tuscaloosa, AL 35401, USA

<sup>4</sup>Department of Geosciences, Princeton University, Princeton, NJ 08544, USA

10 <sup>5</sup>Department of Geosciences, National Taiwan University, Taipei, 106, Taiwan

*Correspondence to:* Alexandra Auderset (a.auderset@soton.ac.uk)

**Abstract.** Foraminifera often form symbiotic relationships with photosynthetic algae, providing a host environment and inorganic nutrients in exchange for photosynthetic organic matter from the algal symbiont. To date, the history of this relationship has been studied in paleoceanographic records with the oxygen and carbon stable isotopes of foraminiferal calcite. More recently, photosymbiotic activity has been observed to impact the nitrogen isotope ratio ( $\delta^{15}\text{N}$ ) of foraminiferal tissue and the organic matter incorporated into foraminiferal tests. Dinoflagellate symbiont-bearing species appear to be lower in  $\delta^{15}\text{N}$  than symbiont-barren species and more similar to their feeding sources, likely due to their retention of low- $\delta^{15}\text{N}$  metabolic ammonium and thus a weaker amplitude for the “trophic enrichment factor,” the  $\delta^{15}\text{N}$  increase per trophic level that is widely observed in food webs. We report new glacial/interglacial foraminifera-bound  $\delta^{15}\text{N}$  (FB- $\delta^{15}\text{N}$ ) data from Deep Sea Drilling Program Site 516, located in the subtropical South Atlantic gyre, which contains multiple foraminifera species at adequately high abundance for inter-species comparison of foraminiferal nitrogen, carbon, and oxygen isotopes over a full glacial cycle. Our data show a conserved  $\delta^{15}\text{N}$  difference of 3-5 ‰ between dinoflagellate-bearing species and the other species, qualitatively consistent with, but greater in amplitude than, the  $\delta^{15}\text{N}$  difference observed in previous modern ocean and core-top studies. We propose that this greater amplitude is the result of lateral transport of symbiont-barren species into the South Atlantic subtropical gyre, which appears to represent a small region of low thermocline nitrate  $\delta^{15}\text{N}$  surrounded by regions with higher thermocline nitrate  $\delta^{15}\text{N}$ . The data point to FB- $\delta^{15}\text{N}$  as the best available proxy for dinoflagellate symbiosis. However, they also suggest caution in regions with strong gradients, where species from contrasting environments occur in a single sediment sample.

## 1 Introduction

30 Biologically available nitrogen (or “fixed N”) is an essential nutrient and thus central to ocean productivity and biogeochemical cycling (Sarmiento and Gruber, 2006), with links to atmospheric  $\text{CO}_2$  and thus climate (Broecker, 1982; Broecker and



Henderson, 1998; Falkowski, 1997; Mcelroy, 1983). The ocean's fixed N reservoir size is dominantly controlled by the balance between N<sub>2</sub> fixation and denitrification (Gruber and Sarmiento, 1997), which can be reconstructed by N isotopes (<sup>15</sup>N/<sup>14</sup>N, or δ<sup>15</sup>N) measured on organic matter in marine sediments (Brandes and Devol, 2002; Deutsch et al., 2004; Galbraith et al., 2013).  
35 In addition, there is the potential for variation in the degree of nitrate consumption in ocean surface waters to also be investigated with N isotopes in marine sediments (Altabet and Francois, 1994).

The isotopic composition of bulk N in marine sediments is variably influenced by diagenesis on the seabed and exogenous N inputs (e.g., (Meckler et al., 2011; Robinson et al., 2012; Möbius, 2013; Schubert and Calvert, 2001). Largely to address these concerns, over the past decades, fossil-bound nitrogen isotope methods have been developed (Kast et al., 2022; Lueders-Dumont et al., 2018; Sigman et al., 1999; Wang et al., 2015; Wang et al., 2014; Brunelle et al., 2007; Robinson et al., 2004), including foraminifera-bound (FB-) δ<sup>15</sup>N (Ren et al., 2009). In contrast to bulk sediment δ<sup>15</sup>N, fossil-bound organic matter represents a specific N pool in the sediment archive that is physically protected from bacterial/chemical diagenesis, exogenous N contamination and thermal stress by the biomineral matrix, and appears to be minimally affected by calcite dissolution (Martínez-García et al., 2022). The first applications of the FB-δ<sup>15</sup>N proxy focused on reconstructing past changes  
45 in the N cycle in the North Atlantic (Ren et al., 2009; Straub et al., 2013), Pacific (Ren et al., 2012a; Ren et al., 2017; Ren et al., 2015) and Southern Ocean (Martínez-García et al., 2014) over Pleistocene glacial/interglacial cycles. More recent studies have shown that FB-δ<sup>15</sup>N can provide reliable information about changes in the N cycle through the Cenozoic (Auderset et al., 2022; Kast et al., 2019; Hess et al., 2023; Wang et al., 2022).

Studies in the oligotrophic ocean, where surface-water nitrate is fully consumed, have established that FB-δ<sup>15</sup>N in surface sediments reflect the δ<sup>15</sup>N of shallow subsurface nitrate (i.e., the nitrate that is supplied to and consumed in the euphotic zone) (Ren et al., 2012b; Ren et al., 2009; Schiebel et al., 2018). Water column studies indicate seasonal changes in FB-δ<sup>15</sup>N that parallel the changes in the δ<sup>15</sup>N of bulk filtered particles (>0.7 μm) and/or net-tow collected material (>150 μm) in surface waters (Smart et al., 2020; Smart et al., 2018) as is consistent with the role of planktonic foraminifera as heterotrophic zooplankton that feed variously on phytoplankton, other heterotrophs, and other types of particulate N (PN) (e.g., (Anderson et al., 1979; Lekieffre et al., 2020; Spindler et al., 1984; Takagi et al., 2019). Phytoplankton assimilate the nitrate supplied from below and provide the food to zooplankton such as foraminifera. The metabolism of zooplankton and other heterotrophs releases low-δ<sup>15</sup>N regenerated N (e.g., ammonium), which is also avidly assimilated by phytoplankton. The net result is that phytoplankton biomass, on average, is lower in δ<sup>15</sup>N than the nitrate supply (Altabet, 1988; Fawcett et al., 2011; Knapp et al., 2005), while herbivorous zooplankton are similar in δ<sup>15</sup>N to the nitrate supply (Montoya et al., 2002). Foraminifera, which  
60 feed on both zooplankton and phytoplankton, thus have a δ<sup>15</sup>N that varies with the δ<sup>15</sup>N of the nitrate supplied and consumed in the euphotic zone (Ren et al., 2009; Ren et al., 2012b; Schiebel et al., 2018; Smart et al., 2018).

Aside from the δ<sup>15</sup>N of their diet, some foraminifera species have a special aspect of their physiology that influences their δ<sup>15</sup>N: most extant spinose planktic foraminifera species host algal symbionts (Hemleben et al., 1989). A typical heterotrophic organism puts most of its dietary organic carbon toward energy generation, releasing the metabolized carbon as  
65 CO<sub>2</sub>. If the C:N:P of the organism is not vastly different from that of its food, this will leave the organism with an excess of N

(as well as P). The N must be removed, typically being lost by deamination and excretion of the resulting ammonium (or of urea or uric acid that are produced from the ammonium). Foraminifera, like other symbiont-bearing organisms (e.g., scleractinian corals), take advantage of their metabolic N and P waste to obtain additional organic carbon: they provide these nutrients to symbiotic algae, which use them to fix additional organic carbon, with a portion of this organic matter then being  
70 returned to the host for its nutrition. This strategy is particularly prominent in low-nutrient marine systems, where environmental nutrient concentrations are low and light is abundant, such as in the oligotrophic subtropical gyres.

Because decisive steps in N catabolism break a N-containing bond, which involves substantial isotopic fractionation, the catabolically produced ammonium is low in  $\delta^{15}\text{N}$  (Silfer et al., 1992). In normal heterotrophic organisms, the loss of this low- $\delta^{15}\text{N}$  ammonium raises the  $\delta^{15}\text{N}$  of the organism, paraphrased by the isotope ecologist's rule of thumb: "You are what you  
75 eat plus a few (permille)" (Deniro, 1976; Deniro and Epstein, 1981). In dinoflagellate-bearing foraminifera, however, the dinoflagellates are thought to assimilate the low- $\delta^{15}\text{N}$  ammonium, recycling it back into the host-symbiont system and thus reducing the  $\delta^{15}\text{N}$  elevation of the foraminifera relative to its food (Ren et al., 2009; Smart et al., 2018). In summary, because N excretion to the environment can be greatly reduced by photosynthetic endosymbiosis, the host-symbiont system is expected to have a  $\delta^{15}\text{N}$  closer to that of their food source and lower than "pure" heterotrophs with the same food source.

80 The role of symbiosis in ancient organisms and ecosystems is of great interest. In low- to mid-latitude surface waters of the ocean, limitation of autotrophic biomass by the availability of nutrients (especially N and P) is common, and changes in ocean nutrient conditions through time may have played a major role in evolution (Hohmann-Marriott and Blankenship, 2011). Photosynthetic endosymbiosis – hosted by organisms such as scleractinian corals and planktonic foraminifera – has been described as an adaptation to settings of N- and P-limited photosynthetic growth, with the heterotrophic host sharing its  
85 metabolic N and P with the autotrophic symbionts in exchange for organic carbon (C) (e.g., Hallock (1981)). Thus, the origination and history of these symbioses may reflect changes in the ocean's nutrient inventories and cycling. In turn, these symbioses may affect nutrient cycling and the availability of nutrients, especially in systems such as shallow reefs.

Photosymbiosis in modern foraminifera species can be investigated by microscopic observations of intracellular algae (Anderson and Be, 1976; Gastrich, 1987; Lee et al., 1965), pulse-chase experiments with isotope labels (Bird et al., 2020;  
90 Lekieffre et al., 2020), active chlorophyll fluorometry (Takagi et al., 2019) or detection of algal DNA (Gast and Caron, 1996; Gast et al., 2000). However, these methods may be complicated by feeding on foraminiferal feeding on algal cells. More to the point, identifying and/or quantifying photosymbiotic activity from fossil foraminifera is even more challenging, particularly for extinct species. The carbon isotopic composition ( $\delta^{13}\text{C}$ ) of the  $\text{CaCO}_3$  of planktic foraminifera tests may be affected by photosymbiosis. Symbiotic photosynthetic organisms have a preference for taking up  $^{12}\text{C}$ , resulting in local dissolved inorganic carbon (DIC) becoming enriched in  $^{13}\text{C}$  which is subsequently integrated into the calcium carbonate shells of foraminifera  
95 (Spero and Deniro, 1987). In larger foraminifera specimens, which host a greater number of photosymbionts, there is a relatively higher enrichment of  $^{13}\text{C}$  than in smaller individuals (Spero et al., 1991). Thus, the relationship between  $\delta^{13}\text{C}$  and test size of symbiont-bearing foraminifera has been proposed and applied as a metric by which to identify symbiosis in ancient foraminifera (D'hondt et al., 1994; Edgar et al., 2013; Ezard et al., 2015; Norris, 1998). The oxygen isotopic composition



100 ( $\delta^{18}\text{O}$ ) of the  $\text{CaCO}_3$  can be used to infer the depth habitat of different foraminifera species, with higher  $\delta^{18}\text{O}$  indicating deeper and colder water masses (e.g., Mulitza et al. (1997), Rashid and Boyle (2007) and citations therein). Thus, it has also been proposed that due to persistent shallower depth habitats throughout ontogeny of symbiont-bearing foraminifera, their size-specific  $\delta^{18}\text{O}$  relationship should be minimal in comparison to symbiont-barren foraminifera species with a larger potential range of depth habitats. However, there are potential pitfalls to these approaches, including sediment mixing, which can influence the size fraction vs.  $\delta^{13}\text{C}$  and  $\delta^{18}\text{O}$  relationship (Hupp et al., 2019) and both the proxies and the biological mechanism behind it require further validation and investigation.

110 The present study investigates the foraminifera-bound nitrogen isotopes (FB- $\delta^{15}\text{N}$ ) as a new tool for the reconstruction of past symbiosis in planktonic foraminifera. We measure shell-bound  $\delta^{15}\text{N}$  in five foraminifera species from a South Atlantic sediment core over a full glacial cycle. We also analyse the same samples for test  $\delta^{18}\text{O}$  and  $\delta^{13}\text{C}$ . In addition, in a subset of samples, we measure  $\delta^{18}\text{O}$  and  $\delta^{13}\text{C}$  in different test size fractions.

## 2 Material and methods

### 2.1 Core site and local hydrography

We analysed samples from sediment core DSDP 516, located on the Rio Grande Rise ( $30^\circ 16'\text{S}$ ,  $35^\circ 17'\text{W}$ , 1313 m water depth) near the core of the oligotrophic subtropical gyre in the South Atlantic Ocean (Fig.1). The local hydrography is dominated by the wind-driven anticyclonic South Atlantic gyre. The subtropical gyre is associated with net subduction, deepened isopycnals, slow nutrient supply from the subsurface to the euphotic zone, and N and P impoverishment in the euphotic zone (Cullen et al., 2002). The nutrient supply to the euphotic zone at Site 516 can be augmented by eddy mixing with the nutrient-bearing waters of the Antarctic Circumpolar Current, which flow east-northeastward along the southern boundary of the gyre (Reid et al., 1977; Schmid et al., 2000). The Brazil Current to the west may also contribute nutrients. However, Site 516 is near the core of the gyre, and relatively isolated from nutrient inputs at the margins. Accordingly, the annual average nitrate concentration ranges from  $0.2 \mu\text{mol/kg}$  to below the limit of detection and chlorophyll *a* concentrations are  $<0.7 \text{ mg/m}^3$  (Siccha et al., 2018). These conditions are comparable to those observed at the oligotrophic Sargasso Sea in the North Atlantic, as established for the Bermuda Atlantic Time-series Station (Smart et al., 2018; Steinberg et al., 2001). The eastern boundary of the subtropical gyre is marked by the Benguela Current, where the persistent southerly and southeasterly winds drive surface water offshore and facilitate upwelling of cold and nutrient-rich subsurface water (Cole and Villacastin, 2000). The Benguela Current flows northward and turns into the southern branch of the South Equatorial Current, which forms the northern edge of the subtropical gyre (Stramma, 1991).

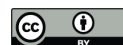

## 2.2 Nitrogen isotope analysis

### 2.2.1 Foraminifer-bound nitrogen isotopes

130 Sediment samples were wet sieved through a 63  $\mu\text{m}$  mesh and dried overnight in a clean oven at 40°C. Between 600-800 individual foraminifera tests were manually picked from size fraction 250-425  $\mu\text{m}$ . We analysed dinoflagellate-bearing *Trilobatus sacculifer*, the two chromotypes *Globigerionoides ruber ruber* and *G. ruber albus* (pink and white, respectively), chrysophyte-bearing *Globigerinella siphonifera* (syn. *G. aequilateralis*), and symbiont-barren *Globigerina bulloides* and *Globorotalia truncatulinoides*. The detailed protocol for measuring FB- $\delta^{15}\text{N}$  used here can be found in Auderset et al. (2022) and Moretti et al. (2024). In short, about 5-7 mg of foraminifera tests were gently crushed and chemically treated to remove external organic matter, clay, and manganese coatings. Subsequently, 3-5 mg was weighed out per sample to allow for N content determination from measured concentrations. The test fragments were first dissolved in hydrochloric acid (50  $\mu\text{l}$  of 3N HCl), and the organic N was converted into nitrate by persulfate oxidation following a slightly modified protocol first used for foraminifera by Ren et al. (2009). The nitrate was converted to nitrous oxide ( $\text{N}_2\text{O}$ ) using denitrifying bacteria *Pseudomonas chlororaphis* and its  $\delta^{15}\text{N}$  was measured by an automated, custom-built  $\text{N}_2\text{O}$  extraction system and inlet by continuous helium carrier flow to an isotope ratio mass spectrometer (Thermo MAT 253) (Casciotti et al., 2002; Sigman et al., 2001; Weigand et al., 2016). To quantify the precision and accuracy of the corrected isotope values, for each series of 30 samples, a total of three different in-house (Max Planck Institute for Chemistry, MPIC) calcite and aragonite laboratory standards were analysed in triplicate, namely a coral standard from the taxon *Porites* (PO-1) with  $\delta^{15}\text{N}$  of  $6.2 \pm 0.3$  ‰, a coral standard from the taxon *Lophelia* (LO-1) with  $\delta^{15}\text{N}$  of  $10.1 \pm 0.4$  ‰, and a mixed foraminifera standard (MF-1) (63-315  $\mu\text{m}$  size fraction) from the North Atlantic (MSM58-17-1, Repschläger et al. (2018)) with  $\delta^{15}\text{N}$  of  $5.92 \pm 0.28$  ‰ (Moretti et al., 2024). After correcting for blank isotope composition, the precision of the multi-analysis average from each run is better than 0.2 ‰ (1SD).

### 2.2.2 Seawater nitrate nitrogen isotopes

150 Seawater samples from the South Atlantic A13.5 section were collected from full water column hydrocasts, spanning 32.0 °S to 41.5 °S. Acid-washed 60 mL HDPE bottles (Nalgene) were rinsed at least three times with sample water prior to filling and immediately freezing at -20 °C until analysis for nitrate concentration and  $\delta^{15}\text{N}$ . For comparison, we also measured seawater from the upper 1000 m of the water column in the subtropical North Atlantic gyre, collected during the CLIMODE (CLIVar MODE water Dynamics Experiment) campaign in 2006 (Hutto et al., 2006). Sampling stations are located across the northern boundary of the subtropical gyre between roughly 36.45 °N and 38.6 °N, which covers the sharp transition in water properties associated with the northern edge of the subtropical gyre (Fig. 1).

As with FB- $\delta^{15}\text{N}$  analysis, the  $\delta^{15}\text{N}$  and  $\delta^{18}\text{O}$  (vs. VSMOW) of nitrate were determined using the denitrifier method (Casciotti et al., 2002; Sigman et al., 2001). For seawater, denitrifying bacteria *Pseudomonas chlororaphis ssp. aureofaciens* (ATCC 13985, Manassas, VA, USA) were used to quantitatively convert  $\text{NO}_3^-$  and  $\text{NO}_2^-$  in samples to  $\text{N}_2\text{O}$ . The product  $\text{N}_2\text{O}$  was measured by a gas chromatography-isotope ratio mass spectrometer (Thermo MAT 253) (Weigand et al., 2016). For the



160 shallow water samples, where  $\text{NO}_2^-$  constitutes over 10% of the total  $\text{NO}_2^- + \text{NO}_3^-$  pool, mostly in the upper 200 meters, sulfamic acid was added to remove nitrite following the protocol described by (Granger and Sigman, 2009). The pooled standard deviation of all  $\text{NO}_3^-$ -only and  $\text{NO}_2^- + \text{NO}_3^-$   $\delta^{15}\text{N}$  measurements, respectively, were 0.24‰ (for shallow samples, <200 m) and 0.08‰ (for deeper samples). Two international potassium nitrate ( $\text{KNO}_3$ ) reference materials, IAEA-N3 ( $\delta^{15}\text{N}$  of 4.7‰,  $\delta^{18}\text{O}$  of 25.6‰) and USGS-34 ( $\delta^{15}\text{N}$  of -1.8‰,  $\delta^{18}\text{O}$  of -27.9‰) were used for standardization, and a lab  $\text{N}_2\text{O}$  165 standard in helium was run in parallel to monitor the consistency of mass spectrometry.

### 2.3 Stable oxygen and carbon isotope analysis

For the down-core records of  $\delta^{18}\text{O}$  and  $\delta^{13}\text{C}$ , we picked samples of all five species from the 250–400  $\mu\text{m}$  size fraction throughout the core. To investigate the size fraction-specific  $\delta^{13}\text{C}$  and  $\delta^{18}\text{O}$ , we chose specimens with sizes of 200–250  $\mu\text{m}$ , 250–315  $\mu\text{m}$ , 315–400  $\mu\text{m}$  and > 400  $\mu\text{m}$  from two climatically distinct (end-member) settings: an interglacial (129 ka, Marine Isotope Stage 170 (MIS) 5) and glacial (27 ka, Last Glacial Maximum (LGM)) time period. There were not enough *G. bulloides* tests within the two largest size fractions (315–400  $\mu\text{m}$  and > 400  $\mu\text{m}$ ); thus, size-specific  $\delta^{13}\text{C}$  and  $\delta^{18}\text{O}$  could not be evaluated for this species. For each sample measured, 30 specimens were gently cracked open with a watch glass, submerged in aliquots of ethanol (pure grade) and put in an ultrasonic bath for 20 seconds. Subsequently, the ethanol was decanted and the samples were dried at 60°C in a clean oven. Clean sample fragments were placed in 4.5 ml exetainer vials, flushed with helium and digested by 175 anhydrous orthophosphoric acid ( $\text{H}_3\text{PO}_4$ ) at 70°C. The liberated  $\text{CO}_2$ -He mixture was transported to the Thermo Finnigan GasBench II preparation device with He as carrier gas and analysed using a Thermo Finnigan Delta V mass spectrometer (Breitenbach and Bernasconi, 2011). For each series of 60 samples, four different calcite laboratory standards were analysed in quintuplicate.  $\text{CaCO}_3$  standard weights were chosen so that they span the entire range of sample weights. VU-Internal-Carbonate Standard (VICS) was used to correct for sample size-based fractionation effects. VICS, IAEA and two in-house 180 carbonate standards (Travertine, Carrara Marble) were used to detect mass spectrometer drift during the run and to quantify the precision and accuracy of the corrected isotope data. After correction for these effects, the reproducibility of the standards was typically better than 0.1 ‰ (1SD) for both  $\delta^{18}\text{O}$  and  $\delta^{13}\text{C}$ .

### 2.4 Stable oxygen and carbon isotope analysis

The age model for DSDP 516 was produced by graphically aligning benthic foraminifera oxygen isotopes (Auderset et al., 185 accepted) to global benthic stack LR04 by Lisiecki and Raymo (2005) using the software AnalySeries (Paillard et al., 1996).

## 3 Results

Downcore changes in FB- $\delta^{15}\text{N}$  and  $\delta^{13}\text{C}$  are small relative to inter-species differences. The weak changes in  $\delta^{15}\text{N}$  across the last 160 ka are discussed elsewhere (Auderset et al., accepted). Here we focus on the inter-species differences (Fig. 2, Fig. 3). FB- $\delta^{15}\text{N}$  data show two distinct groups: *T. sacculifer*, *G. ruber albus* and *G. ruber ruber* of ca. 4.2 ‰ ( $\pm 0.42$ ), 4.1 ‰ ( $\pm 0.43$ ),



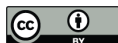

190 and 4.3 ‰ ( $\pm 0.37$ ), respectively, versus *G. truncatulinoides*, *G. bulloides* and *G. siphonifera*, which show more elevated  $\delta^{15}\text{N}$  values of 8.0 ‰ ( $\pm 0.67$ ), 9.3 ‰ ( $\pm 0.45$ ), and 8.8 ‰ ( $\pm 0.46$ ), respectively (Fig. 2a, 3a). The N contents range between 3.8 nmol/mg and 4.5 nmol/mg (Fig. 2b, 3b). We observe similar N contents throughout the record and among the species. The studied foraminifera are well preserved, and the stability of the N content through the record implies little to no diagenetic loss of FB-N after burial through the sediment mixed layer (Fig. S1).

195 The  $\delta^{18}\text{O}$  data show a fairly even spread between the different species (Fig. 2c, 3c). *Trilobatus sacculifer* and *G. ruber* (*albus* and *ruber*) are more depleted in  $^{18}\text{O}$  (with  $\delta^{18}\text{O}$  values of 0.3-0.5 ‰) compared to *G. truncatulinoides*, *G. bulloides*, and *G. siphonifera* (1.1-1.9‰). Over the last 160 ka, *T. sacculifer*, *G. ruber* (*albus* and *ruber*), and *G. siphonifera* generally follow the same trend. These species show a temporal variation of  $\sim 0.7$ -1 ‰ with a maximum at 40 ka and minimum at 90 ka (Fig. 2c, 3c). *Globorotalia truncatulinoides* and *G. bulloides* show a smaller amplitude of variation of  $\sim 0.5$  ‰ and no clear  $\delta^{18}\text{O}$  maximum/minimum (Fig 2c, 3c). Apart from *G. bulloides* with a  $\delta^{13}\text{C}$  range between -1.6 ‰ and -0.3 ‰, all species range between 0.6 ‰ and 1.7 ‰. *Globigerina bulloides*  $\delta^{13}\text{C}$  shows a substantial negative offset of ca. 1.5 ‰ from the other species and is more variable than all other species analysed here (Fig. 2d, 3d).

All species investigated appear to show a positive relationship between test carbonate  $\delta^{13}\text{C}$  and test size, although some reversals occur in the largest (400  $\mu\text{m}$ ) size fraction (data for *G. bulloides* are for the two smallest size fractions only) (Fig. S2). We record different slopes of the linear fit in LGM and MIS 5 samples (the two end-member settings) for *T. sacculifer* and *G. ruber* (*albus* and *ruber*) (Table S1). The regression coefficient ( $R^2$ ) for the LGM ranges between 0.80 and 0.95, and for MIS 5 between 0.76 and 0.91, with *G. ruber* *albus* having the lowest  $R^2$ . In contrast, the slopes of the linear fit remains fairly constant for *G. siphonifera* (0.0013 vs. 0.0024) and *G. truncatulinoides* (0.0043 vs. 0.0038) during the LGM vs. MIS 5, respectively. However, the strength of the relationship does differ between the two intervals, with an  $R^2$  of 0.36 vs. 0.74 for *G. siphonifera* and 0.83 vs. 0.46 for *G. truncatulinoides* in the LGM vs. MIS 5 samples, respectively. *T. sacculifer* records the highest average slope of 0.053 and *G. siphonifera* records the lowest of 0.018.

215 Like test carbonate  $\delta^{13}\text{C}$ , test carbonate  $\delta^{18}\text{O}$  also shows a correlation with test size, but the relationship varies downcore and between species (Fig. S3). The strongest correlation is observed in *G. ruber* *ruber* during the LGM and *T. sacculifer* during MIS 5, with regression coefficients of 0.88 and 0.78, respectively. The weakest correlations are observed within *G. truncatulinoides* in both LGM and MIS 5 with  $R^2$  values of 0.13 and 0.01, respectively. The biggest difference in relationship between the two time periods occurs in *G. siphonifera*, with an  $R^2$  of 0.30 in the LGM vs. 0.62 during MIS 5.

Seawater nitrate nitrogen isotopes and nitrate concentration profiles from CLIMODE and A13.5 stations are shown in Fig. S4 and discussed in the Supplementary Material.

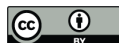

## 220 4 Discussion

### 4.1 FB- $\delta^{15}\text{N}$ at DSDP Site 516

In planktic foraminifera species *T. sacculifer* and *G. ruber*, dinoflagellate symbionts may recycle low- $\delta^{15}\text{N}$  ammonium and thus keep FB- $\delta^{15}\text{N}$  low, preventing the full ca. 3 ‰ elevation characteristic of a trophic level increase (Minagawa and Wada, 1984; Ren et al., 2012b; Smart et al., 2018). Therefore, the  $\delta^{15}\text{N}$  of *T. sacculifer* and *G. ruber* should more closely match the  $\delta^{15}\text{N}$  of their food source than in species without dinoflagellate symbionts. In oligotrophic areas, such as the subtropical South Atlantic gyre, surface nitrate is fully consumed by phytoplankton. With the role of euphotic zone N recycling described above (Altabet, 1988; Fawcett et al., 2011), this leads to herbivorous zooplankton close to or slightly higher than the  $\delta^{15}\text{N}$  of this consumed nitrate (e.g.,  $3.6 \pm 1.0$  ‰ ( $n = 107$ ) for zooplankton vs. 2.6 ‰ for thermocline nitrate in the Sargasso Sea (Montoya et al., 2002; Smart et al., 2018). With foraminifera feeding on a mixture of small and large phytoplankton and zooplankton, this yields a  $\delta^{15}\text{N}$  for the foraminifera diet that is close to the  $\delta^{15}\text{N}$  of the subsurface nitrate supply (Fawcett et al., 2011). At DSDP Site 516, the FB- $\delta^{15}\text{N}$  of the dinoflagellate-bearing species *T. sacculifer* and *G. ruber* (Gastrich, 1987; Hemleben et al., 1989) ranges between 4 ‰ and 5 ‰. This value is lower than global mean pycnocline nitrate (of 6.25‰; Fripiat et al. (2021)), suggesting that regional subsurface nitrate  $\delta^{15}\text{N}$  has been lowered by  $\text{N}_2$  fixation, as has been observed in other subtropical gyres (Harms et al., 2019; Knapp et al., 2008; Marshall et al., 2022; Casciotti et al., 2008; Liu et al., 1996; Yoshikawa et al., 2015) especially the North Atlantic (Marconi et al., 2017; Marconi et al., 2015). For comparison, in the Sargasso Sea, shallow thermocline nitrate  $\delta^{15}\text{N}$  is 2.6‰ (Fawcett et al., 2015), and surface sediment FB- $\delta^{15}\text{N}$  are 2.4‰ (*T. sacculifer*) and 2.6‰ (*G. ruber*) (Smart et al., 2018).

In *G. truncatulinoides*, the bulk of the shell derives from calcification below 100 m, indicating that they spend much of their lives below the euphotic zone, where light conditions are unsuitable for photosymbionts (Reynolds et al., 2018; Schiebel and Hemleben, 2017). This is consistent with their high  $\delta^{15}\text{N}$  compared to dinoflagellate symbiont bearers. *G. bulloides* and *G. siphonifera* are more enriched in  $^{15}\text{N}$  than the other analysed species in DSDP Site 516. This may indicate minimal nitrogen recycling associated with non-dinoflagellate symbionts, e.g. chrysophytes for *G. siphonifera*, such that this species groups with the symbiont-barren species (Faber et al., 1989; Faber et al., 1988; Ren et al., 2012b; Smart et al., 2018; Granger et al., in review). As to the higher  $\delta^{15}\text{N}$  of *G. bulloides* and *G. siphonifera* relative to *G. truncatulinoides*, this might be explained by a higher  $\delta^{15}\text{N}$  for their food source. This possibility is pursued in Sect. 4.4.

### 4.2 Comparison with carbonate oxygen and carbon isotopes in DSDP Site 516

To gain additional insight into the controls on FB- $\delta^{15}\text{N}$ , we compare the data with our measurements of carbonate  $\delta^{18}\text{O}$  and  $\delta^{13}\text{C}$  of the foraminiferal shells.  $\delta^{18}\text{O}$  differences among species have been used to reconstruct depth habitat (Fairbanks and Wiebe, 1980; Ravelo and Fairbanks, 1992). The controls on the  $\delta^{13}\text{C}$  of planktonic foraminiferal calcite are a matter of debate (Spero and Williams, 1989; Spero et al., 1991); however, size-specific  $\delta^{13}\text{C}$  measurements have been proposed as a proxy for photosymbiosis (Norris, 1996).





Minimum  $\delta^{18}\text{O}$  values in foraminiferal assemblages point to warmer waters and shallower depth habitats, which are likely to be required or at least best-suited for photosymbiont-bearing foraminifera (see also Supplementary Material). By cross-plotting FB- $\delta^{15}\text{N}$  and  $\delta^{18}\text{O}$  from Site 516, we see two distinct groups: shallow-dwellers with dinoflagellate symbionts with lighter FB- $\delta^{15}\text{N}$  and  $\delta^{18}\text{O}$ , and deeper-dwellers with non-dinoflagellate symbionts/ symbiont-barren recording heavier FB- $\delta^{15}\text{N}$  and  $\delta^{18}\text{O}$  (Fig. 4b). Thus, unsurprisingly, the measurements are consistent with a shallow depth habitat for photosymbiosis.

Foraminiferal  $\delta^{13}\text{C}$  is likely sensitive to organism-scale  $\delta^{13}\text{C}$  gradients induced by photosymbiont activity and foraminifera respiration, with a  $^{13}\text{C}$  enrichment for increased symbiont photosynthetic activity (Spero and Deniro, 1987). However, habitat, variation in dissolved inorganic carbon, remineralization and other environmental factors also influence carbonate  $\delta^{13}\text{C}$ , such that it alone is unlikely to be a reliable proxy for photosymbiosis (See Supplementary Material). For example, the deepest dwelling species, *G. truncatulinoides*, is symbiont barren and yet  $\delta^{13}\text{C}$  does not distinguish it from even the most photosymbiotically active species (Fig. 2d, Fig. 3d). In our measurements, shallow subsurface/ thermocline-dweller *G. bulloides* is the only species to be clearly lower in  $\delta^{13}\text{C}$  than the other foraminifera. It has been speculated that the presence of metabolically active cyanobacterial endobionts (*Synechococcus*) affects the carbon isotopes measured in the host *G. bulloides* through respiration, instead of photosynthesis from the endobiont, leading to  $^{13}\text{C}$  depletion instead of  $^{13}\text{C}$  enrichment in the calcifying microenvironment (Bird et al., 2020; Febvre-Chevalier, 1971; Spero and Lea, 1996). In any case, the cross-plot between FB- $\delta^{15}\text{N}$  and  $\delta^{13}\text{C}$  strongly discriminates between *G. bulloides* versus the other foraminifera analysed in Site 516 (Fig. 4c). Interestingly, *G. siphonifera* clusters in the same group as *G. truncatulinoides*, although both species are very different in terms of depth habitat and symbiotic relationship. Altogether, the  $\delta^{15}\text{N}$ - $\delta^{13}\text{C}$  comparison might be interpreted as indicating that the non-dinoflagellate symbionts have a significant but variable effect on carbonate  $\delta^{13}\text{C}$  while having no appreciable effect on FB- $\delta^{15}\text{N}$ . However, this view is complicated for  $\delta^{13}\text{C}$  by the observation that *G. truncatulinoides*, which is symbiont-barren, has a similar  $\delta^{13}\text{C}$  to species with a range of symbionts.

An alternative method proposed for the detection of photosymbiosis in fossil foraminifera is through the relationship of foraminiferal carbonate  $\delta^{13}\text{C}$  with test size (Spero and Deniro, 1987). The argument is that the preferential uptake of  $^{12}\text{CO}_2$  by the photosynthesizing symbionts raises the  $\delta^{13}\text{C}$  of the internal DIC pool from which the calcification proceeds (Spero et al., 1997). Larger individual foraminifera can host more symbionts per surface area of the individual, resulting in  $\delta^{13}\text{C}$  elevation compared to smaller foraminifera (Spero et al., 1991). Thus, a steeper rise in  $\delta^{13}\text{C}$  with increasing specimen size (steeper positive slope) indicates potentially higher photosymbiotic activity (Edgar et al., 2013; Norris, 1996; Shaw et al., 2021). According to this method, dinoflagellate-bearing *G. ruber* and *T. sacculifer* and potentially chrysophyte-hosting *G. siphonifera* would be predicted to have a steeper rise in  $\delta^{13}\text{C}$  with size than *G. truncatulinoides* or *G. bulloides*. However, for all investigated species except *G. siphonifera*, our measurements indicate similar slopes in  $\delta^{13}\text{C}$  vs. size, with dinoflagellate bearing species *T. sacculifer*, and *G. ruber* (*albus* and *ruber*) showing no statistically significant difference in slopes compared to non-symbiotic species *G. truncatulinoides* (Fig. S2, Table S1). The anomalously weak/near-zero slope for *G. siphonifera*  $\delta^{13}\text{C}$  (Fig. S2e) has been observed before (Ezard et al., 2015). This may be linked to differences in the chrysophyte-host relationship but requires further study. That *G. truncatulinoides* falls into the same range of slopes (as well as absolute  $\delta^{13}\text{C}$



values) as *T. sacculifer* and *G. ruber* and has a steeper slope than *G. siphonifera* indicates that the previously proposed symbiosis metric of  $\delta^{13}\text{C}$  vs. size may not be sensitive enough to capture all photosymbiotic relationships.

290 However,  $\text{FB-}\delta^{15}\text{N}$  may also have its complexities. In particular, the  $\text{FB-}\delta^{15}\text{N}$  differences between foraminifera with and without dinoflagellate symbionts is notably greater at DSDP Site 516 than reported at other sites across the global ocean (Costa et al., 2016; Martínez-García et al., 2014; Ren et al., 2012b; Schiebel et al., 2018; Smart et al., 2020; Smart et al., 2018).  $\text{FB-}\delta^{15}\text{N}$  might vary due to processes in the water column, such as seasonal changes in the supply of N affecting the  $\delta^{15}\text{N}$  of the food source (Smart et al., 2020; Smart et al., 2018) or lateral transport (Granger et al., in review). In the next section we compare DSDP Site 516 with core top samples from geographically distinct regions to examine the variability of  $\text{FB-}\delta^{15}\text{N}$  differences amongst foraminifer species relative to hydrologic environment.

### 295 4.3 $\text{FB-}\delta^{15}\text{N}$ as a new proxy for photosymbiosis?

To further advance our understanding of  $\text{FB-}\delta^{15}\text{N}$  and its suitability as a metric of photosymbiosis, we now broaden our view beyond DSDP Site 516. We compile all available and published core top  $\text{FB-}\delta^{15}\text{N}$  data that contained dinoflagellate bearing and non-dinoflagellate bearing foraminifera (Fig. S5, Table S2). The calculated offsets between the two categories across all core sites show that non-dinoflagellate bearing foraminifera (*Globorotalia menardii*, *Neogloboquadrina dutertrei*, *G.*  
300 *siphonifera*, *Globorotalia tumida*, *Globorotalia hirsuta*, *Globorotalia inflata*, *G. truncatulinoides*, *G. bulloides*) are consistently enriched in  $^{15}\text{N}$  compared to dinoflagellate bearing foraminifera (*G. ruber*, *T. sacculifer*, *O. universa*) (Fig. 5b). For the most part,  $\text{FB-}\delta^{15}\text{N}$  offsets are consistent across wide geographic ranges of the core sites over different latitudes and biogeochemical regimes. With this compilation, we first consider the average  $\text{FB-}\delta^{15}\text{N}$  values that arise for different species and their implications for  $\text{FB-}\delta^{15}\text{N}$  differences among species with different symbioses (Fig. 5b).

305 The calculated mean  $\text{FB-}\delta^{15}\text{N}$  offsets between dinoflagellate bearing and non-dinoflagellate/symbiont-barren foraminifera from the global compilation correlate with chlorophyll-*a* (Chl-*a*) measurements by Takagi et al. (2019). They analysed living foraminifera from the central and western Pacific Ocean and the tropical eastern Atlantic Ocean across different seasons and estimated the intensity of photosymbiosis (Fig. 6). Based on Takagi et al. (2019), *O. universa*, *T. sacculifer*, *G. ruber ruber* and *G. ruber albus* have a higher percentage of intracellular Chl-*a* and thus photosymbiont activity. This is in  
310 contrast to *G. truncatulinoides*, *G. bulloides* and *G. inflata* with little/no Chl-*a* inside of the tests, which record the highest  $\text{FB-}\delta^{15}\text{N}$  compared to dinoflagellate bearing foraminifera (*G. ruber*, *T. sacculifer*, *O. universa*) (Fig. 4b). *Neogloboquadrina dutertrei* and *G. menardi* are consistently higher in Chl-*a*/biomass and lower in their  $\text{FB-}\delta^{15}\text{N}$  offset from photosymbiont-barren *G. bulloides* and *G. truncatulinoides*. However, the strength of the Chl-*a* /biomass vs.  $\text{FB-}\delta^{15}\text{N}$  relationship is not extraordinarily strong ( $R^2 = 0.54$ ), suggesting that Chl-*a* content is not the only factor driving  $\text{FB-}\delta^{15}\text{N}$ .

315 *Globigerinella siphonifera* stands out in the correlation of Chl-*a* /biomass in the global compilation (Fig. 6), as it records similar levels of Chl-*a*/biomass compared to dinoflagellate symbiont-bearing foraminifera *G. ruber* (*ruber* and *albus*), despite their high  $\text{FB-}\delta^{15}\text{N}$  offset from dinoflagellate-hosting foraminifera reported in DSDP Site 516 (Fig. 3a) and in previous studies (Granger et al., in review; Ren et al., 2012b; Smart et al., 2018; Li et al., 2019). Some degradation of the correlation is



to be expected from the disconnect in the times and locations of samples analysed. For example, analyses of the chlorophyll  
320 content and/or chlorophyll activity in any herbivorous foraminifera species could also be affected by algae attached to the  
foraminifera or fresh and not yet metabolized algae within the food vacuoles of the foraminifera individual. Alternatively, the  
high FB-  $\delta^{15}\text{N}$  offset in *G. siphonifera* may result from digestion of its symbionts prior to gametogenesis (Faber et al., 1988),  
making *G. siphonifera* symbiont-barren in its later stages of calcification.

Alternatively, the relatively high FB- $\delta^{15}\text{N}$  of *G. siphonifera* and other species bearing symbionts that are not  
325 dinoflagellates may indicate that these symbioses involve lower rates of symbiont activity and the fact that Chl-*a*  
concentrations are not necessarily tightly coupled to growth rate. For example, even at a low chrysophyte growth rate, if the  
foraminifera are only slowly harvesting organic matter from the symbionts, then the amount of Chl-*a* will be elevated. In this  
interpretation, the uniquely low FB- $\delta^{15}\text{N}$  of the dinoflagellate-bearing species supports higher photosynthetic rates in  
dinoflagellate symbionts and, thus, a generally more important role for the symbiosis in the dinoflagellate-bearing species  
330 (e.g., as in *O. universa*; Lekieffre et al. (2020)). The shallow depth (i.e. high-light) habitats of the dinoflagellate species is fully  
consistent with this interpretation, as is the dominance of dinoflagellate symbioses among modern symbiotic corals (Davy et  
al., 2012).

#### 4.4 Deviations from the FB- $\delta^{15}\text{N}$ photosymbiosis paradigm at Site 516

Despite the overall consistency observed across sites in the global FB- $\delta^{15}\text{N}$  compilation, there are notable differences in inter-  
335 species offsets between the global compilation and DSDP Site 516 (Fig. 5a). In particular, among the foraminiferal species  
analysed, the FB- $\delta^{15}\text{N}$  differences between the three dinoflagellate-bearing species and the three other species (*G.*  
*truncatulinooides*, *G. bulloides*, *G. siphonifera*) are unusually great at DSDP Site 516 (Fig. 7). These differences warrant  
investigation here, with a focus on their cause and thus their implications for interspecies FB- $\delta^{15}\text{N}$  differences as a paleoproxy  
for foraminiferal photosymbiosis.

##### 340 4.4.1 Depth habitat

The isotopic composition of suspended PN varies systematically with depth in the water column (Altabet, 1988; Altabet et al.,  
1991). Suspended PN has its lowest  $\delta^{15}\text{N}$  in the euphotic layer, increasing with depth below the euphotic zone as a consequence  
of the preferential release of  $^{14}\text{N}$ -ammonium during microbial decomposition. The PN  $\delta^{15}\text{N}$  increase from the surface to ~500  
m depth can be up to 6 ‰ (Altabet, 1988; Altabet et al., 1991; Hannides et al., 2013). Therefore, planktic foraminifera living  
345 below the euphotic zone might be expected to have a higher  $\delta^{15}\text{N}$  for their feeding source than surface-dwellers.

In Site 516, our N isotope results show clear differences between two groups of species. The group of *G.*  
*truncatulinooides*, *G. bulloides*, and *G. siphonifera* have a  $\delta^{15}\text{N}$  composition that is 3 to 5 ‰ higher than the group of *T.*  
*sacculifer* and *G. ruber*. These observations are in good agreement with recent studies (Ren et al., 2012b; Smart et al., 2018),  
including samples from upper-ocean net tows (surface 200 m), moored sediment traps, core-tops, and down-core sediments.  
350 Planktic foraminifera living below the euphotic zone, when feeding on suspended PN, such as *G. truncatulinooides*, could



incorporate food that is enriched in  $^{15}\text{N}$  (Mintenbeck et al., 2007). To date, there are not yet any published depth profile data for PN or nitrate isotopes close to core Site 516. Based on data from the North Atlantic (Altabet, 1988; Altabet et al., 1991) and South Atlantic surface particles (Mino et al., 2002), PON  $\delta^{15}\text{N}$  may be up to 9 ‰ at 1000 m water depth.

355 However, several lines of evidence suggest that depth habitat is not the main cause of the difference in  $\delta^{15}\text{N}$  between the two groups. The two morpho- and geno-types of *G. siphonifera* (Types I and II) are surface-to-thermocline dwellers (Bijma et al., 1990; Schiebel and Hemleben, 2017), and yet have a higher  $\delta^{15}\text{N}$  than the deeper dwelling *G. truncatulinoides* (Hemleben et al., 1985) (Fig. 2a). Other differences in depth habitat inferred from foraminiferal  $\delta^{18}\text{O}$  and  $\delta^{13}\text{C}$  (Supplementary Material, Figs. S6, S7) are also not consistent with the inter-species  $\delta^{15}\text{N}$  offsets that would be expected if depth were the main driver of FB- $\delta^{15}\text{N}$ . For example, among the foraminifera species analysed at Site 516, *G. truncatulinoides* is the deepest dweller (of 360 the species we measured) according to its  $\delta^{18}\text{O}$  values, but it has a  $\delta^{15}\text{N}$  that is lower than that of *G. siphonifera* and *G. bulloides*. In addition, at DSDP Site 516, *G. siphonifera*  $\delta^{15}\text{N}$  is more similar to *G. truncatulinoides* during interglacials but more similar to *G. bulloides* during glacials. Yet the  $\delta^{18}\text{O}$  of *G. siphonifera* seems to follow a similar temporal trend to *T. sacculifer* and *G. ruber*, which would indicate no major change in the relative depth habitat of *G. siphonifera* through the glacial cycle. These observations suggest that depth habitat *per se* is not the main driver of the grouping we see in the FB- $\delta^{15}\text{N}$  data. Depth also 365 cannot explain the larger than average FB- $\delta^{15}\text{N}$  offset at Site 516, given the the higher FB- $\delta^{15}\text{N}$  values for *G. siphonifera* and *G. bulloides* than for *G. truncatulinoides*.

#### 4.4.2 Seasonality

Seasonality can also play a role in determining which nitrogen isotope signals are incorporated by foraminifera. While the foraminifera production often follows the seasonality of phytoplankton productivity in a given environment, there are major 370 differences among species (Schiebel et al., 2001). In temperate latitudes and parts of the subtropical gyres, most nitrate supply from below occurs during the winter, with a nitrate-fueled phytoplankton bloom in the spring giving way to intensive ammonium recycling between phytoplankton and zooplankton in the summer-autumn (Dugdale and Goering, 1967; Eppley and Peterson, 1979). Depending on the most productive season of a given species of planktic foraminifera, it may feed within a nitrate-based or ammonium-based ecosystem, with the latter being associated with a lower  $\delta^{15}\text{N}$  for suspended PN, 375 zooplankton, and sinking PN (Fawcett et al., 2011). This distinction is apparent in the seasonality of foraminifera  $\delta^{15}\text{N}$  (Smart et al., 2020; Smart et al., 2018). Thus, if we assume the season of production is similar in the South Atlantic compared to the North Atlantic gyre, then we would expect Site 516 summer-bloomers *T. sacculifer* and *G. ruber* to be lower in  $\delta^{15}\text{N}$  than deep living and year-round production of *G. truncatulinoides*, which is possibly fueled by settling organic matter following maximum phytoplankton production in surface waters. However, the offset that we observe between *T. sacculifer*/*G. ruber* 380 versus *G. truncatulinoides* is 4-4.5 ‰, which is substantially higher than typical seasonal offsets between summer and winter PON  $\delta^{15}\text{N}$  in oligotrophic regions (e.g., Smart et al. (2018)). Thus, if seasonality is the explanation for the particularly large FB- $\delta^{15}\text{N}$  inter-species offsets at DSDP Site 516, it would appear that some special source of seasonality is required for the South Atlantic subtropical gyre. Below, we provide a potential explanation that relates to the small spatial extent of the South



Atlantic subtropical gyre and the associated incursion of waters from the east and from higher latitudes into the region underlain  
385 by DSDP Site 516.

#### 4.4.3 Lateral transport

In austral winter-spring, between July and September, the oligotrophic South Atlantic gyre is affected by wind-driven mixing and an Ekman transport-driven incursion of nutrient-rich waters with high- $\delta^{15}\text{N}$  nitrate from the Southern Ocean (Figs. 1, 8, S8). *Globigerina bulloides*, perhaps the most opportunistic among the species discussed here, is abundant at the southern margin of the Atlantic subtropical gyre around 35°S (Boltovskoy, 1962), thus recording the higher  $\delta^{15}\text{N}$  associated with high  
390 degrees of nitrate assimilation from a nitrate source with a  $\delta^{15}\text{N}$  that is similar to that of Subantarctic Mode Water (Smart et al., 2015). Indeed, it has been shown that *G. bulloides* reaches highest abundances when food supply is increased (Kretschmer et al., 2018; Mortyn and Charles, 2003; Schiebel et al., 1995). Similarly, *G. siphonifera* is a subtropical species, which yields highest shell fluxes at times of highest productivity (Jonkers and Kučera, 2015), which would be the winter-spring season in  
395 the South Atlantic. For both *G. bulloides* and *G. siphonifera*, we observed highly variable specimen counts across the last 160 ka, which was in strong contrast to the uniformly high abundances of *T. sacculifer*, *G. ruber albus* and *G. truncatulinoides* throughout the record (Fig. S9). Therefore, the large FB- $\delta^{15}\text{N}$  offset between summer-blooming species (*T. sacculifer* and *G. ruber*) and *G. bulloides* and *G. siphonifera* in Site 516 could reflect increased nutrient influx from the Southern Ocean with an elevated  $\delta^{15}\text{N}$  signature in austral winter-spring during northward movement of the subtropical front.

400 As previously documented, not only nutrients but also planktic foraminifera can be transported from other oceanic regions to the South Atlantic (Granger et al., in review; Peeters et al., 2004; Smart et al., 2020). We compare the nitrate profiles for “inside-gyre” vs. “outside-gyre” stations in the North Atlantic (Fawcett et al., 2015) (Fig. 8a). Subsurface nitrate at 200 m inside the North Atlantic gyre is ca. 3 ‰ lower than subsurface nitrate outside the gyre, which is due to gyre-related N-fixation processes keeping thermocline nitrate  $\delta^{15}\text{N}$  low. While no similar data exists from inside the South Atlantic gyre, a hypothetical  
405 “inside gyre”  $\delta^{15}\text{N}$  profile based on the southern “outside gyre” would put the subsurface nitrate  $\delta^{15}\text{N}$  at 4 ‰ (inside gyre) versus 7 ‰ (outside gyre) (Fig. 8b), matching with *T. sacculifer* and *G. ruber* FB- $\delta^{15}\text{N}$  at Site 516. Symbiont-barren *G. truncatulinoides* agrees with the “inside-gyre” profile when adding the typical, full trophic enrichment of ~3‰ observed for marine zooplankton (Minagawa and Wada, 1984). *G. bulloides* and *G. siphonifera*, in contrast, appear to be elevated by an additional 1-2 ‰. This additional offset could be due to a Southern Ocean influence, where subsurface nitrate derived from  
410 Subantarctic Mode Water is enriched in  $^{15}\text{N}$  due to incomplete nutrient consumption (Sigman et al., 2000; Smart et al., 2015). Indeed, the distinct  $\delta^{13}\text{C}$  in *G. bulloides* has been interpreted as reflecting its Southern Ocean origin (Ninnemann and Charles, 1997) (Supplementary Material, Fig. S7). In our interpretation, both the relatively high  $\delta^{15}\text{N}$  of Subantarctic-sourced nitrate and the greater potential for incursion of extra-subtropical water into the small South Atlantic gyre contribute to the abnormally large FB- $\delta^{15}\text{N}$  difference, at DSDP Site 516, between *G. bulloides*/*G. siphonifera* and the gyre-dwelling symbiotic species.  
415 The South Atlantic may be more prone to this process than the North Atlantic gyre or other sites from the core top compilation due to the smaller geographic extent of the gyre and/or the proximity to the Southern Ocean.

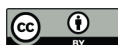

## 5 Conclusions

FB- $\delta^{15}\text{N}$  appears to consistently distinguish between dinoflagellate-bearing, non-dinoflagellate symbiont-(e.g., chrysophyte- or pelagophytes-)bearing, and symbiont-barren species. The FB- $\delta^{15}\text{N}$  range of the middle group may indicate that non-  
420 dinoflagellate symbioses in foraminifera are relatively weak in terms of the internal N demand they generate, which could indicate that they generate substantially less photosynthetic energy for the host than do dinoflagellate endosymbionts. This possibility warrants testing with other approaches.

While FB- $\delta^{15}\text{N}$  offsets are remarkably consistent in our global compilation, DSDP Site 516 stands out with its large FB- $\delta^{15}\text{N}$  offsets between dinoflagellate-bearing foraminifera (*G. ruber* and *T. sacculifer*) and non-dinoflagellate bearing  
425 foraminifera (*G. siphonifera* and *G. bulloides*). We propose that DSDP Site 516 is influenced by the Southern Ocean through seasonal northward movement of fronts, leading to the input to the region of organic matter and/or *G. bulloides* and *G. siphonifera* specimens that were sourced from the high- $\delta^{15}\text{N}$  nitrate of the Subantarctic Zone. With this caveat regarding regions with strong environmental gradients, our findings support the use of inter-species FB- $\delta^{15}\text{N}$  offsets to investigate the emergence and evolution of photosymbiosis in foraminifera and potentially other animals.

430

*Data availability.* The data is available in Supplementary Data and in the PANGAEA database (link will follow).

*Competing interests.* The authors declare that they have no conflict of interest.

435 *Author contribution.* A.A. and A.M.-G. designed the study. A.A. measured foraminifera-bound nitrogen isotopes in the lab of A.M.-G.. Y.R. and D.M. measured seawater nitrate nitrogen isotopes. A.A., S.M.S, D.M.S. and A.M.-G. wrote the manuscript. All authors contributed to the interpretation of the data and provided input to the final manuscript at different stages of the project.

440 *Acknowledgements.* We thank Björn Taphorn for micropalaeontological assistance, Florian Rubach, Barbara Hinnenberg, and Mareike Schmitt for technical support and X anonymous reviewers for their comments. This work was funded by the Max Planck Society and SNSF mobility grant P2EZIP2\_200000.

445





## Figures

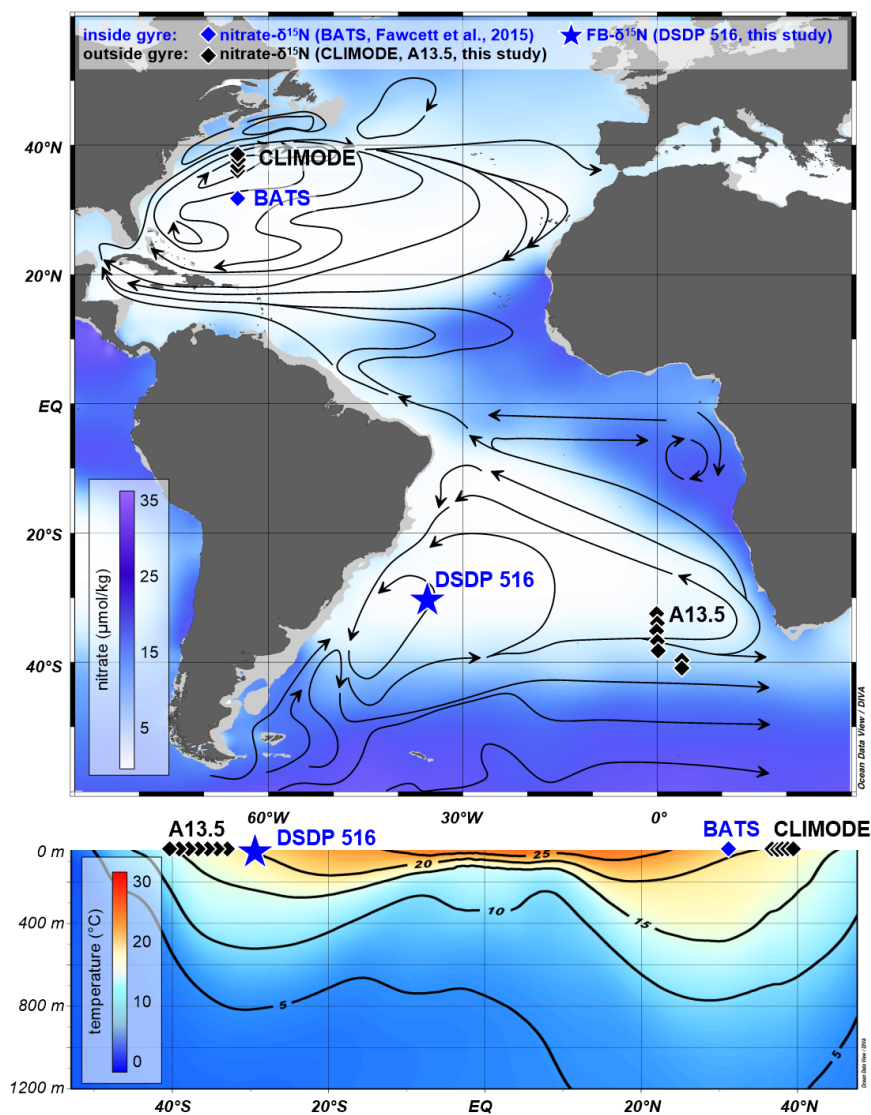

450 **Figure 1. Oceanographic context for DSDP Site 516.** (a) Nitrate map (in  $\mu\text{mol/kg}$ ) at 100 m water depth with sample location DSDP Site 516 for FB- $\delta^{15}\text{N}$  (this study) and nitrate  $\delta^{15}\text{N}$  profiles from CLIMODE (this study), BATS (Fawcett et al., 2015) and A13.5 (this study). Main surface currents and oceanographic fronts modified from (Peterson and Stramma, 1991; Wefer et al., 1996) and (Schmitz Jr. and McCartney, 1993) (b) Mean annual temperature cross section. Map and cross section generated with Ocean Data View and data set from World Ocean Atlas 18 (Garcia et al., 2013; Schlitzer, 2015).

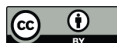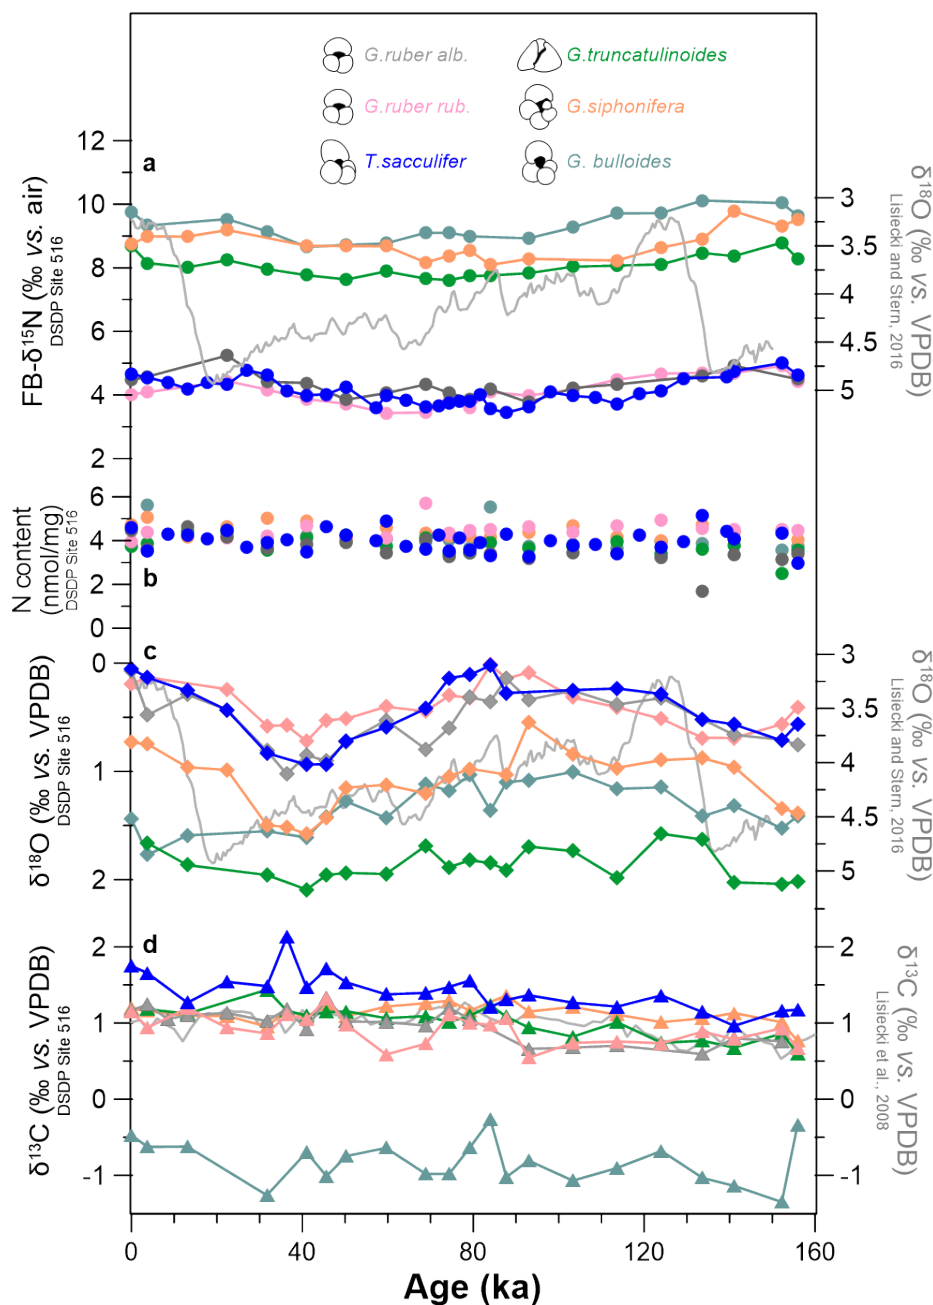

455 **Figure 2.** 160 kyr time series of species-specific nitrogen, carbon and oxygen isotopes in DSDP Site 516. (a) Species-specific FB- $\delta^{15}\text{N}$  (left axis) measured in DSDP 516 over the last 160 ka for *G. bulloides* (turquoise), *G. siphonifera* (orange), *G. truncatulinooides* (green), *T. sacculifer* (blue), *G. ruber albus* (grey), *G. ruber ruber* (pink) and benthic  $\delta^{18}\text{O}$  stack (right axis) (grey line) (Lisiecki and Stern, 2016) (b) N content for each species. (c) Species-specific  $\delta^{18}\text{O}$  together with Atlantic stack of benthic  $\delta^{18}\text{O}$  (Lisiecki and Stern, 2016)). (d) Species-specific  $\delta^{13}\text{C}$  together with benthic stack of South Atlantic cores at shallow depths (Lisiecki et al., 2008).

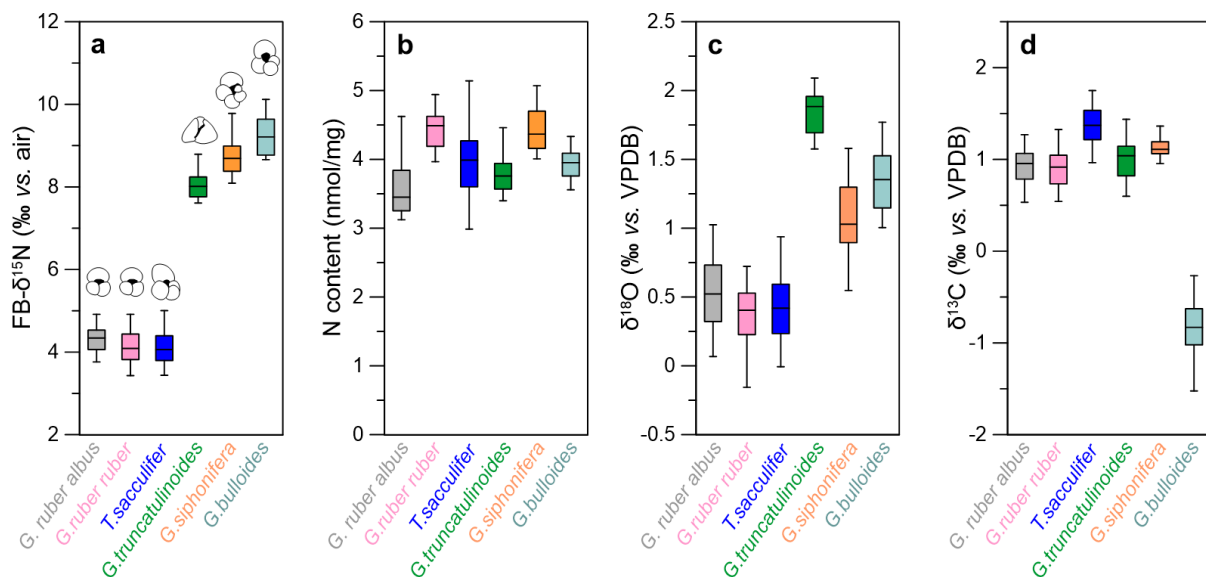

460 **Figure 3. Box plots of species-specific nitrogen, carbon and oxygen isotopes in DSDP Site 516. (a)** Species-specific FB- $\delta^{15}\text{N}$  values for the last 160 ka for *G. bulloides* (turquoise), *G. siphonifera* (orange), *G. truncatulinoides* (green), *T. sacculifer* (blue), *G. ruber albus* (grey), *G. ruber ruber* (pink). **(b)** N content for each species. **(c & d)** Species-specific  $\delta^{18}\text{O}$  and  $\delta^{13}\text{C}$ , respectively.

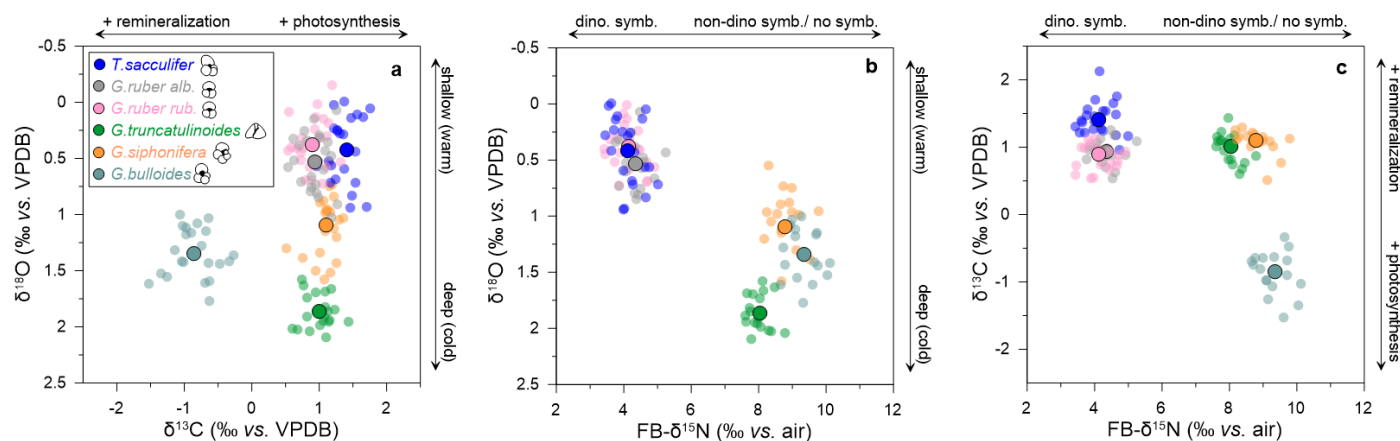

465 **Figure 4. Relationships between oxygen, carbon and nitrogen isotopes.** Interspecies comparison between *T. sacculifer*, *G. ruber* (*albus* and *ruber*), *G. bulloides*, *G. siphonifera*, and *G. truncatulinoides* in DSDP Site 516. Arrows indicate Distinction between shallow (warm) vs. deep (cold) dweller, remineralization vs. photosynthesis in water column and non-dinoflagellate bearing/non-symbiotic vs. dinoflagellate bearing foraminifera.

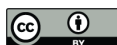

470

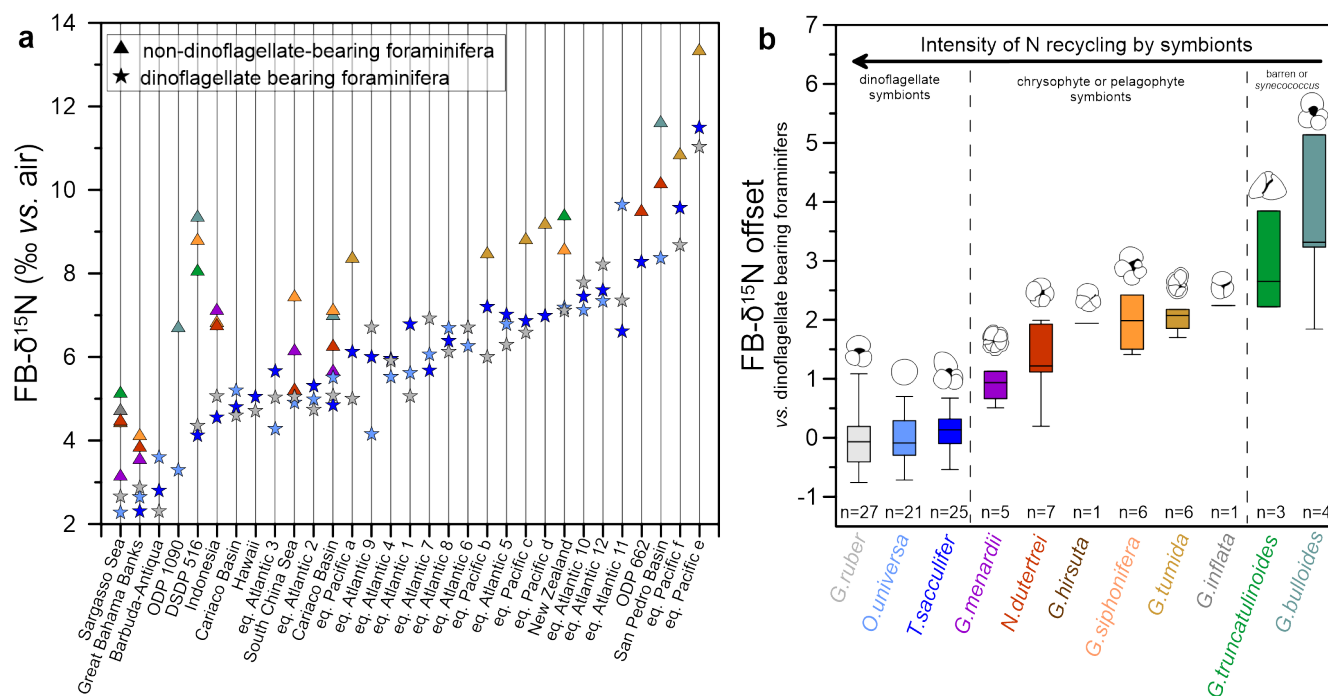

475

**Figure 5. Compilation of FB- $\delta^{15}\text{N}$  values and offsets between dinoflagellate-bearing and non-dinoflagellate-bearing foraminifera from different locations. (a)** Foraminifera from core tops in the Sargasso Sea (Smart et al., 2018), Great Bahama Banks, Indonesia, Hawaii, South China Sea, New Zealand (Ren et al., 2012b), equatorial Atlantic 1-11 (Schiebel et al., 2018) and equatorial Pacific a-f (Holocene samples only) (Costa et al., 2016) (See Table S2 and Fig. S4 for more information about core sites). **(b)** Across all sites in (a), the average FB- $\delta^{15}\text{N}$  offset between and dinoflagellate-barrren and dinoflagellate-bearing foraminifera, categorized by symbiont relationship and proposed intensity of internal ammonium recycling.

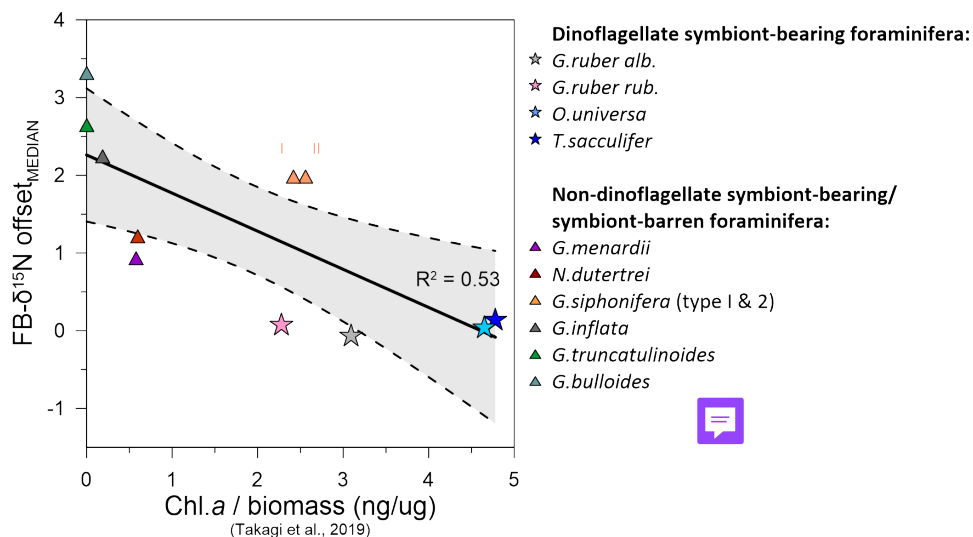

480 **Figure 6. Chlorophyll a concentrations in living planktic foraminifera vs. FB- $\delta^{15}\text{N}$  offsets between dinoflagellate-bearing and other non-dinoflagellate-bearing foraminifera in our core top compilation.** Chlorophyll-a/biomass values were measured in foraminifera collected in the central and western Pacific Ocean and the tropical eastern Atlantic Ocean across different seasons (Takagi et al., 2019).

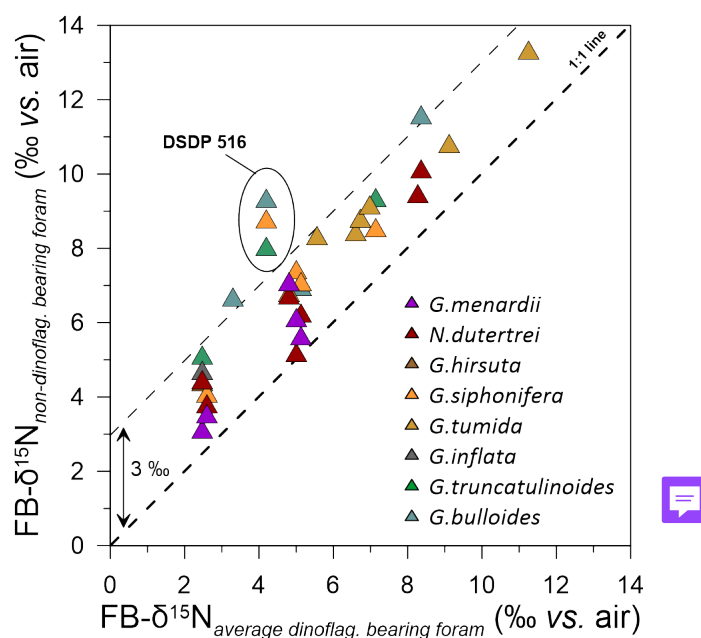

485 **Figure 7. Uniquely high FB- $\delta^{15}\text{N}$  offsets between non-dinoflagellate-bearing and dinoflagellate-bearing foraminifera at DSDP Site 516.** Offsets between non-dinoflagellate-bearing foraminifera vs dinoflagellate-bearing foraminifera (the average of *G. ruber albus*, *T. sacculifer* and *O. universa*), with DSDP Site 516 indicated. DSDP Site 516 exhibits stronger  $^{15}\text{N}$  enrichment for non-dinoflagellate-bearing foraminifera than other oligotrophic sites.

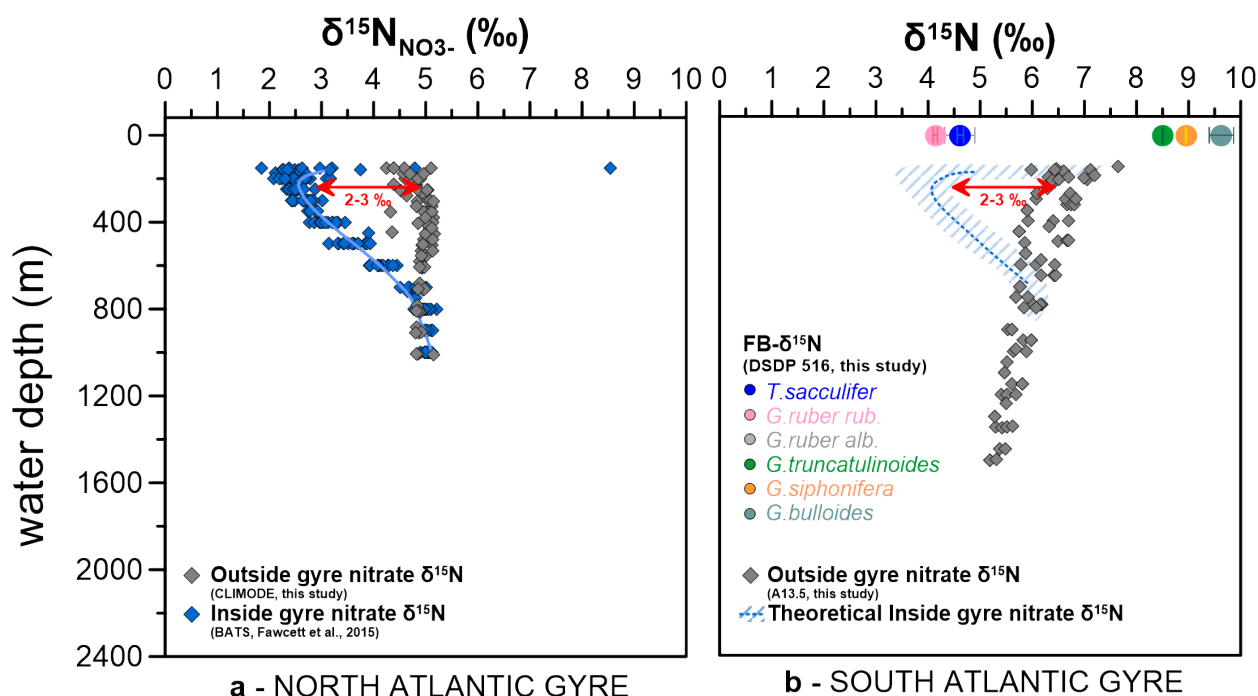

490

**Figure 8. Seawater nitrate profile comparison between North and South Atlantic gyres.** (a) Seawater nitrate  $\delta^{15}\text{N}$  for the North Atlantic gyre system with distinct isotopic signature for outside (grey diamonds, CLIMODE, this study) and inside (blue diamonds, BATS, Fawcett et al. (2015)) the gyre system, (b) Seawater nitrate  $\delta^{15}\text{N}$  outside the South Atlantic gyre system (blue diamonds, profile A13.5, this study). Hashed area with blue line indicates theoretical seawater nitrate  $\delta^{15}\text{N}$  for location within the gyre based on the difference between inside and outside the gyre isotopic composition in the North Atlantic. Coloured circles indicate FB- $\delta^{15}\text{N}$  from Site 516. Locations for seawater  $\delta^{15}\text{N}$  profiles are shown in Fig. 1.

495



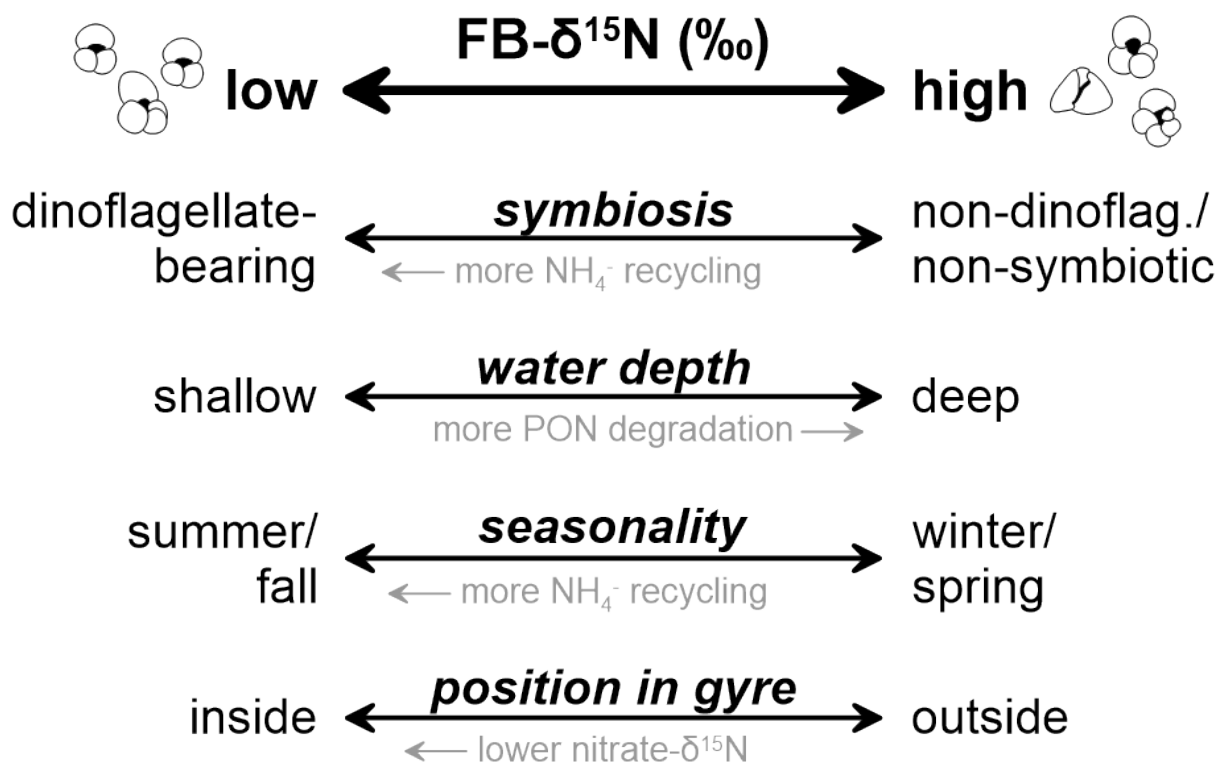

500 **Figure 9. Proposed different processes affecting FB- $\delta^{15}\text{N}$  in DSDP Site 516.** Shallow-dwelling, summer-blooming, dinoflagellate hosting foraminifera located within the oligotrophic gyre record generally lower FB- $\delta^{15}\text{N}$  values than non-symbiotic or foraminifera hosting symbionts other than dinoflagellates that live generally in a deeper depth habitat, bloom during winter/spring season and/or live outside oligotrophic gyres.

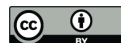

## 505 References

- Altabet, M.: Variations in nitrogen isotopic composition between sinking and suspended particles: implications for nitrogen cycling and particle transformation in the open ocean, *Deep Sea Research Part A. Oceanographic Research Papers*, 35, 535-554, [https://doi.org/10.1016/0198-0149\(88\)90130-6](https://doi.org/10.1016/0198-0149(88)90130-6), 1988.
- 510 Altabet, M. and Francois, R.: The use of nitrogen isotopic ratio for reconstruction of past changes in surface ocean nutrient utilization, in: *Carbon Cycling in the Glacial Ocean: Constraints on the Ocean's Role in Global Change: Quantitative Approaches in Paleoceanography*, Springer, 281-306, 1994.
- Altabet, M. A., Deuser, W. G., Honjo, S., and Stienen, C.: Seasonal and depth-related changes in the source of sinking particles in the North Atlantic, *Nature*, 354, 136, 1991.
- 515 Anderson, O., Spindler, M., Bé, A., and Hemleben, C.: Trophic activity of planktonic foraminifera, *Journal of the Marine Biological Association of the United Kingdom*, 59, 791-799, 1979.
- Anderson, O. R. and Be, A. W.: The ultrastructure of a planktonic foraminifer, *Globigerinoides sacculifer* (Brady), and its symbiotic dinoflagellates, *The Journal of Foraminiferal Research*, 6, 1-21, 1976.
- Auderset, A., Moretti, S., Taphorn, B., Ebner, P.-R., Kast, E., Wang, X. T., Schiebel, R., Sigman, D. M., Haug, G. H., and  
520 Martínez-García, A.: Enhanced ocean oxygenation during Cenozoic warm periods, *Nature*, 609, 77-82, /10.1038/s41586-022-05017-0, 2022.
- Auderset, A., Fripiat, F., Creel, R., Oesch, L., Studer, A. S., Repschlaeger, J., Hathorne, E., Vonhof, H., Schiebel, R., Bochner, L., Lawrence, K. T., Ren, H., Sigman, D. M., Haug, G. H., and Martínez-García, A.: Sea level modulation of Atlantic nitrogen fixation over glacial cycles, *Paleoceanography and Paleoclimatology*, accepted.
- 525 Bijma, J., Faber, W. W., and Hemleben, C.: Temperature and salinity limits for growth and survival of some planktonic foraminifers in laboratory cultures, *The Journal of Foraminiferal Research*, 20, 95-116, 1990.
- Bird, C., LeKieffre, C., Jauffrais, T., Meibom, A., Geslin, E., Filipsson, H. L., Maire, O., Russell, A. D., and Fehrenbacher, J. S.: Heterotrophic Foraminifera Capable of Inorganic Nitrogen Assimilation, *Frontiers in microbiology*, 11, 3076, 2020.
- Boltovskoy, E.: Planktonic foraminifera as indicators of different water masses in the South Atlantic, *Micropaleontology*, 403-  
530 408, 1962.
- Brandes, J. A. and Devol, A. H.: A global marine-fixed nitrogen isotopic budget: Implications for Holocene nitrogen cycling, *Global Biogeochemical Cycles*, 16, 67-61-67-14, <https://doi.org/10.1029/2001GB001856>, 2002.
- Breitenbach, S. F. and Bernasconi, S. M.: Carbon and oxygen isotope analysis of small carbonate samples (20 to 100 Åµg) with a GasBench II preparation device, *Rapid Communications in Mass Spectrometry*, 25, 1910-1914, 2011.
- 535 Broecker, W. S.: Glacial to interglacial changes in ocean chemistry, *Progress in Oceanography*, 11, 151-197, 1982.
- Broecker, W. S. and Henderson, G. M.: The sequence of events surrounding Termination II and their implications for the cause of glacial-interglacial CO<sub>2</sub> changes, *Paleoceanography*, 13, 352-364, 1998.
- Brunelle, B. G., Sigman, D. M., Cook, M. S., Keigwin, L. D., Haug, G. H., Plessen, B., Schettler, G., and Jaccard, S. L.: Evidence from diatom-bound nitrogen isotopes for subarctic Pacific stratification during the last ice age and a link to North  
540 Pacific denitrification changes, *Paleoceanography*, 22, 2007.
- Casciotti, K. L., Trull, T. W., Glover, D. M., and Davies, D.: Constraints on nitrogen cycling at the subtropical North Pacific Station ALOHA from isotopic measurements of nitrate and particulate nitrogen, *Deep Sea Research Part II: Topical Studies in Oceanography*, 55, 1661-1672, <https://doi.org/10.1016/j.dsr2.2008.04.017>, 2008.
- 545 Casciotti, K. L., Sigman, D. M., Hastings, M. G., Böhlke, J., and Hilkert, A.: Measurement of the oxygen isotopic composition of nitrate in seawater and freshwater using the denitrifier method, *Analytical chemistry*, 74, 4905-4912, <https://doi.org/10.1021/ac020113w>, 2002.
- Cole, J. and Villacastin, C.: Sea surface temperature variability in the northern Benguela upwelling system, and implications for fisheries research, *International Journal of Remote Sensing*, 21, 1597-1617, 2000.
- 550 Costa, K. M., McManus, J. F., Anderson, R. F., Ren, H., Sigman, D. M., Winckler, G., Fleisher, M. Q., Marcantonio, F., and Ravelo, A. C.: No iron fertilization in the equatorial Pacific Ocean during the last ice age, *Nature*, 529, 519-522, <https://doi.org/10.1038/nature16453>, 2016.
- Cullen, J. J., Franks, P. J., Karl, D. M., and Longhurst, A.: Physical influences on marine ecosystem dynamics, *The sea*, 12, 297-336, 2002.



- 555 D'Hondt, S., Zachos, J. C., and Schultz, G.: Stable isotopic signals and photosymbiosis in late Paleocene planktic foraminifera, *Paleobiology*, 20, 391-406, 1994.
- Davy, S. K., Allemand, D., and Weis, V. M.: Cell biology of cnidarian-dinoflagellate symbiosis, *Microbiology and Molecular Biology Reviews*, 76, 229-261, 2012.
- DeNiro, M. J.: You are what you eat (plus a few‰): the carbon isotope cycle in food chains, *geological society of America abstracts with programs*, 834,
- 560 DeNiro, M. J. and Epstein, S.: Influence of diet on the distribution of nitrogen isotopes in animals, *Geochim Cosmochim Acta*, 45, 341-351, 1981.
- Deutsch, C., Sigman, D. M., Thunell, R. C., Meckler, A. N., and Haug, G. H.: Isotopic constraints on glacial/interglacial changes in the oceanic nitrogen budget, *Global Biogeochemical Cycles*, 18, 2004.
- Dugdale, R. C. and Goering, J. J.: Uptake of new and regenerated forms of nitrogen in primary productivity, *Limnology and Oceanography*, 12, 196-206, <https://doi.org/10.4319/lo.1967.12.2.0196>, 1967.
- 565 Edgar, K. M., Bohaty, S., Gibbs, S., Sexton, P., Norris, R., and Wilson, P.: Symbiont 'bleaching' in planktic foraminifera during the Middle Eocene Climatic Optimum, *Geology*, 41, 15-18, 2013.
- Eppley, R. W. and Peterson, B. J.: Particulate organic matter flux and planktonic new production in the deep ocean, *Nature*, 282, 677-680, 1979.
- 570 Ezard, T. H., Edgar, K. M., and Hull, P. M.: Environmental and biological controls on size-specific  $\delta^{13}\text{C}$  and  $\delta^{18}\text{O}$  in recent planktonic foraminifera, *Paleoceanography*, 30, 151-173, 2015.
- Faber, W., Anderson, O., and Caron, D.: Algal-foraminiferal symbiosis in the planktonic foraminifer *Globigerinella aequilateralis*; II, Effects of two symbiont species on foraminiferal growth and longevity, *The Journal of Foraminiferal Research*, 19, 185-193, 1989.
- 575 Faber, W., Anderson, O., Lindsey, J., and Caron, D.: Algal-foraminiferal symbiosis in the planktonic foraminifer *Globigerinella aequilateralis*; I, Occurrence and stability of two mutually exclusive chrysophyte endosymbionts and their ultrastructure, *The Journal of Foraminiferal Research*, 18, 334-343, 1988.
- Fairbanks, R. G. and Wiebe, P. H.: Foraminifera and chlorophyll maximum: vertical distribution, seasonal succession, and paleoceanographic significance, *Science*, 209, 1524-1526, 1980.
- 580 Falkowski, P. G.: Evolution of the nitrogen cycle and its influence on the biological sequestration of  $\text{CO}_2$  in the ocean, *Nature*, 387, 272, 1997.
- Fawcett, S. E., Ward, B. B., Lomas, M. W., and Sigman, D. M.: Vertical decoupling of nitrate assimilation and nitrification in the Sargasso Sea, *Deep Sea Research Part I: Oceanographic Research Papers*, 103, 64-72, <https://doi.org/10.1016/j.dsr.2015.05.004>, 2015.
- 585 Fawcett, S. E., Lomas, M. W., Casey, J. R., Ward, B. B., and Sigman, D. M.: Assimilation of upwelled nitrate by small eukaryotes in the Sargasso Sea, *Nat Geosci*, 4, 717-722, 2011.
- Febvre-Chevalier, C.: Constitution ultrastructurale de *Globigerina bulloides* d'Orbigny, 1826 (Rhizopoda-Foraminifera), *Protistologica*, 7, 311-324, 1971.
- 590 Fripiat, F., Martínez-García, A., Marconi, D., Fawcett, S. E., Kopf, S. H., Luu, V. H., Rafter, P. A., Zhang, R., Sigman, D. M., and Haug, G. H.: Nitrogen isotopic constraints on nutrient transport to the upper ocean, *Nat Geosci*, 14, 855-861, 2021.
- Galbraith, E. D., Kienast, M., Albuquerque, A. L., Altabet, M. A., Batista, F., Bianchi, D., Calvert, S. E., Contreras, S., Crosta, X., and De Pol-Holz, R.: The acceleration of oceanic denitrification during deglacial warming, *Nat Geosci*, 6, 579, 2013.
- Garcia, H. E., Boyer, T. P., Locarnini, R. A., Antonov, J. I., Mishonov, A. V., Baranova, O. K., Zweng, M. M., Reagan, J. R., Johnson, D. R., and Levitus, S.: World ocean atlas 2013. Volume 3, Dissolved oxygen, apparent oxygen utilization, and oxygen saturation, 2013.
- 595 Gast, R. and Caron, D.: Molecular phylogeny of symbiotic dinoflagellates from planktonic foraminifera and radiolaria, *Molecular Biology and Evolution*, 13, 1192-1197, 1996.
- Gast, R. J., McDonnell, T. A., and Caron, D. A.: srDNA-based taxonomic affinities of algal symbionts from a planktonic foraminifer and a solitary radiolarian, *Journal of Phycology*, 36, 172-177, 2000.
- 600 Gastrich, M. D.: Ultrastructure of a new intracellular symbiotic alga found within planktonic foraminifera 1 *Journal of Phycology*, 23, 623-632, 1987.



- Granger, J. and Sigman, D. M.: Removal of nitrite with sulfamic acid for nitrate N and O isotope analysis with the denitrifier method, *Rapid Communications in Mass Spectrometry: An International Journal Devoted to the Rapid Dissemination of Up-to-the-Minute Research in Mass Spectrometry*, 23, 3753-3762, 2009.
- 605 Granger, R., Smart, S. M., Foreman, A., Auderset, A., Campbell, E., Marshall, T., Haug, G. H., Sigman, D. M., Martínez-García, A., and Fawcett, S. E.: Tracking Agulhas leakage in the South Atlantic using modern planktic foraminifera nitrogen isotopes, *Geochemistry, Geophysics, Geosystems*, in review.
- Gruber, N. and Sarmiento, J. L.: Global patterns of marine nitrogen fixation and denitrification, *Global Biogeochemical Cycles*, 11, 235-266, 1997.
- 610 Hallock, P.: Algal symbiosis: a mathematical analysis, *Marine Biology*, 62, 249-255, 1981.
- Hannides, C. C. S., Popp, B. N., Choy, C. A., and Drazen, J. C.: Midwater zooplankton and suspended particle dynamics in the North Pacific Subtropical Gyre: A stable isotope perspective, *Limnology and Oceanography*, 58, 1931-1946, <https://doi.org/10.4319/lo.2013.58.6.1931>, 2013.
- Harms, N. C., Lahajnar, N., Gaye, B., Rixen, T., Dähnke, K., Ankele, M., Schwarz-Schampera, U., and Emeis, K.-C.: Nutrient distribution and nitrogen and oxygen isotopic composition of nitrate in water masses of the subtropical southern Indian Ocean, *Biogeosciences*, 16, 2715-2732, 2019.
- Hemleben, C., Spindler, M., and Anderson, O. R.: *Modern planktonic foraminifera*, Springer Science & Business Media 1989.
- Hemleben, C., Spindler, M., Breiting, I., and Deuser, W. G.: Field and laboratory studies on the ontogeny and ecology of some globorotaliid species from the Sargasso Sea off Bermuda, *Journal of Foraminiferal Research*, 15, 254-272, 1985.
- 620 Hess, A. V., Auderset, A., Rosenthal, Y., Miller, K. G., Zhou, X., Sigman, D. M., and Martínez-García, A.: A well-oxygenated eastern tropical Pacific during the warm Miocene, *Nature*, 1-5, /10.1038/s41586-023-06104-6, 2023.
- Hohmann-Marriott, M. F. and Blankenship, R. E.: Evolution of photosynthesis, *Annual review of plant biology*, 62, 515-548, 2011.
- Hupp, B. N., Kelly, D. C., Zachos, J. C., and Bralower, T. J.: Effects of size-dependent sediment mixing on deep-sea records of the Paleocene-Eocene Thermal Maximum, *Geology*, 47, 749-752, 2019.
- 625 Hutto, L., Weller, R., Fratantoni, D., Lord, J., Kemp, J., Lund, J., Brambilla, E., and Bigorre, S.: CLIVAR Mode Water Dynamics Experiment (CLIMODE) fall 2005, R/V Oceanus voyage 419, November 9, 2005–November 27, 2005, 2006.
- Jonkers, L. and Kučera, M.: Global analysis of seasonality in the shell flux of extant planktonic Foraminifera, *Biogeosciences*, 12, 2207-2226, 2015.
- 630 Kast, E. R., Stolper, D. A., Auderset, A., Higgins, J. A., Ren, H., Wang, X. T., Martínez-García, A., Haug, G. H., and Sigman, D. M.: Nitrogen isotope evidence for expanded ocean suboxia in the early Cenozoic, *Science*, 364, 386-389, <https://doi.org/10.1126/science.aau5784>, 2019.
- Kast, E. R., Griffiths, M. L., Kim, S. L., Rao, Z. C., Shimada, K., Becker, M. A., Maisch, H. M., Eagle, R. A., Clarke, C. A., and Neumann, A. N.: Cenozoic megatooth sharks occupied extremely high trophic positions, *Science Advances*, 8, eabl6529, 2022.
- 635 Knapp, A. N., Sigman, D. M., and Lipschultz, F.: N isotopic composition of dissolved organic nitrogen and nitrate at the Bermuda Atlantic Time-series Study site, *Global Biogeochemical Cycles*, 19, 2005.
- Knapp, A. N., DiFiore, P. J., Deutsch, C., Sigman, D. M., and Lipschultz, F.: Nitrate isotopic composition between Bermuda and Puerto Rico: Implications for N<sub>2</sub> fixation in the Atlantic Ocean, *Global Biogeochemical Cycles*, 22, doi:10.1029/2007GB003107, 2008.
- 640 Kretschmer, K., Jonkers, L., Kucera, M., and Schulz, M.: Modeling seasonal and vertical habitats of planktonic foraminifera on a global scale, *Biogeosciences*, 15, 4405-4429, 2018.
- Lee, J. J., Freudenthal, H. D., Kossoy, V., and Bé, A.: Cytological observations on two planktonic foraminifera, *Globigerina bulloides* d'Orbigny, 1826, and *Globigerinoides ruber* (d'Orbigny, 1839) Cushman, 1927, *The Journal of Protozoology*, 12, 531-542, 1965.
- 645 LeKieffre, C., Spero, H. J., Fehrenbacher, J. S., Russell, A. D., Ren, H., Geslin, E., and Meibom, A.: Ammonium is the preferred source of nitrogen for planktonic foraminifer and their dinoflagellate symbionts, *Proceedings of the Royal Society B*, 287, 20200620, 2020.
- Li, D.-W., Xiang, R., Wu, Q., and Kao, S.-J.: Planktic foraminifera-bound organic nitrogen isotopic composition in contemporary water column and sediment trap, *Deep Sea Research Part I: Oceanographic Research Papers*, 143, 28-34, 2019.
- 650



- Lisiecki, L. E. and Raymo, M. E.: A Pliocene-Pleistocene stack of 57 globally distributed benthic  $\delta^{18}\text{O}$  records, *Paleoceanography*, 20, 2005.
- 655 Lisiecki, L. E. and Stern, J. V.: Regional and global benthic  $\delta^{18}\text{O}$  stacks for the last glacial cycle, *Paleoceanography*, 31, 1368-1394, 2016.
- Lisiecki, L. E., Raymo, M. E., and Curry, W. B.: Atlantic overturning responses to Late Pleistocene climate forcings, *Nature*, 456, 85-88, 2008.
- 660 Liu, K.-K., Su, M.-J., Hsueh, C.-R., and Gong, G.-C.: The nitrogen isotopic composition of nitrate in the Kuroshio Water northeast of Taiwan: Evidence for nitrogen fixation as a source of isotopically light nitrate, *Marine Chemistry*, 54, 273-292, 1996.
- Lueders-Dumont, J. A., Wang, X. T., Jensen, O. P., Sigman, D. M., and Ward, B. B.: Nitrogen isotopic analysis of carbonate-bound organic matter in modern and fossil fish otoliths, *Geochim Cosmochim Acta*, 224, 200-222, 2018.
- 665 Marconi, D., Weigand, M. A., Rafter, P. A., McIlvin, M. R., Forbes, M., Casciotti, K. L., and Sigman, D. M.: Nitrate isotope distributions on the US GEOTRACES North Atlantic cross-basin section: Signals of polar nitrate sources and low latitude nitrogen cycling, *Marine Chemistry*, 177, 143-156, 2015.
- Marconi, D., Sigman, D. M., Casciotti, K. L., Campbell, E. C., Alexandra Weigand, M., Fawcett, S. E., Knapp, A. N., Rafter, P. A., Ward, B. B., and Haug, G. H.: Tropical dominance of  $\text{N}_2$  fixation in the North Atlantic Ocean, *Global Biogeochemical Cycles*, 31, 1608-1623, 2017.
- 670 Marshall, T., Granger, J., Casciotti, K. L., Dähnke, K., Emeis, K.-C., Marconi, D., McIlvin, M. R., Noble, A. E., Saito, M. A., and Sigman, D. M.: The Angola Gyre is a hotspot of dinitrogen fixation in the South Atlantic Ocean, *Communications Earth & Environment*, 3, 151, 2022.
- Martínez-García, A., Sigman, D. M., Ren, H., Anderson, R. F., Straub, M., Hodell, D. A., Jaccard, S. L., Eglinton, T. I., and Haug, G. H.: Iron fertilization of the Subantarctic Ocean during the last ice age, *Science*, 343, 1347-1350, <https://doi.org/10.1126/science.1246848>, 2014.
- 675 Martínez-García, A., Jung, J., Ai, X. E., Sigman, D. M., Auderset, A., Duprey, N. N., Foreman, A., Fripiat, F., Leichter, J., and Lüdecke, T.: Laboratory Assessment of the Impact of Chemical Oxidation, Mineral Dissolution, and Heating on the Nitrogen Isotopic Composition of Fossil-bound Organic Matter, 2022.
- McElroy, M. B.: Marine biological controls on atmospheric  $\text{CO}_2$  and climate, *Nature*, 302, 328-329, 10.1038/302328a0, 1983.
- 680 Meckler, A. N., Ren, H., Sigman, D. M., Gruber, N., Plessen, B., Schubert, C. J., and Haug, G. H.: Deglacial nitrogen isotope changes in the Gulf of Mexico: Evidence from bulk sedimentary and foraminifera-bound nitrogen in Orca Basin sediments, *Paleoceanography*, 26, 2011.
- Minagawa, M. and Wada, E.: Stepwise enrichment of  $^{15}\text{N}$  along food chains: further evidence and the relation between  $\delta^{15}\text{N}$  and animal age, *Geochim Cosmochim Acta*, 48, 1135-1140, 1984.
- 685 Mino, Y., Saino, T., Suzuki, K., and Marañón, E.: Isotopic composition of suspended particulate nitrogen ( $\delta^{15}\text{N}_{\text{sus}}$ ) in surface waters of the Atlantic Ocean from 50 N to 50 S, *Global Biogeochemical Cycles*, 16, 7-1-7-9, 2002.
- Mintenbeck, K., Jacob, U., Knust, R., Arntz, W., and Brey, T.: Depth-dependence in stable isotope ratio  $\delta^{15}\text{N}$  of benthic POM consumers: the role of particle dynamics and organism trophic guild, *Deep Sea Research Part I: Oceanographic Research Papers*, 54, 1015-1023, 2007.
- 690 Möbius, J.: Isotope fractionation during nitrogen remineralization (ammonification): Implications for nitrogen isotope biogeochemistry, *Geochim Cosmochim Acta*, 105, 422-432, 2013.
- Montoya, J. P., Carpenter, E. J., and Capone, D. G.: Nitrogen fixation and nitrogen isotope abundances in zooplankton of the oligotrophic North Atlantic, *Limnology and Oceanography*, 47, 1617-1628, 2002.
- 695 Moretti, S., Duprey, N. N., Foreman, A. D., Arns, A., Brömme, S., Jung, J., Ai, X. E., Auderset, A., Bieler, A. L., and Eck, C.: Analytical improvements and assessment of long-term performance of the oxidation-denitrifier method, *Rapid Communications in Mass Spectrometry*, 38, e9650, 2024.
- Mortyn, P. G. and Charles, C. D.: Planktonic foraminiferal depth habitat and  $\delta^{18}\text{O}$  calibrations: Plankton tow results from the Atlantic sector of the Southern Ocean, *Paleoceanography*, 18, 2003.
- Mulitza, S., Dürkoop, A., Hale, W., Wefer, G., and Stefan Niebler, H.: Planktonic foraminifera as recorders of past surface-water stratification, *Geology*, 25, 335-338, 1997.
- 700 Ninnemann, U. S. and Charles, C. D.: Regional differences in Quaternary Subantarctic nutrient cycling: Link to intermediate and deep water ventilation, *Paleoceanography*, 12, 560-567, 1997.





- Norris, R. D.: Symbiosis as an evolutionary innovation in the radiation of Paleocene planktic foraminifera, *Paleobiology*, 22, 461-480, 1996.
- 705 Norris, R. D.: Recognition and macroevolutionary significance of photosymbiosis in molluscs, corals, and foraminifera, *The Paleontological Society Papers*, 4, 68-100, 1998.
- Paillard, D., Labeyrie, L., and Yiou, P.: Macintosh program performs time-series analysis, *Eos, Transactions American Geophysical Union*, 77, 379-379, 1996.
- 710 Peeters, F. J., Acheson, R., Brummer, G.-J. A., De Ruijter, W. P., Schneider, R. R., Ganssen, G. M., Ufkes, E., and Kroon, D.: Vigorous exchange between the Indian and Atlantic oceans at the end of the past five glacial periods, *Nature*, 430, 661-665, 2004.
- Peterson, R. G. and Stramma, L.: Upper-level circulation in the South Atlantic Ocean, *Progress in oceanography*, 26, 1-73, 1991.
- Rashid, H. and Boyle, E. A.: Mixed-layer deepening during Heinrich events: A multi-planktonic foraminiferal  $\delta^{18}\text{O}$  approach, *Science*, 318, 439-441, 2007.
- 715 Ravelo, A. and Fairbanks, R.: Oxygen isotopic composition of multiple species of planktonic foraminifera: Recorders of the modern photic zone temperature gradient, *Paleoceanography*, 7, 815-831, 1992.
- Reid, J. L., Nowlin Jr, W. D., and Patzert, W. C.: On the characteristics and circulation of the southwestern Atlantic Ocean, *Journal of Physical Oceanography*, 7, 62-91, 1977.
- 720 Ren, H., Sigman, D. M., Chen, M. T., and Kao, S. J.: Elevated foraminifera-bound nitrogen isotopic composition during the last ice age in the South China Sea and its global and regional implications, *Global Biogeochemical Cycles*, 26, 2012a.
- Ren, H., Sigman, D. M., Thunell, R. C., and Prokopenko, M. G.: Nitrogen isotopic composition of planktonic foraminifera from the modern ocean and recent sediments, *Limnology and Oceanography*, 57, 1011-1024, /10.4319/lo.2012.57.4.1011, 2012b.
- 725 Ren, H., Sigman, D., Meckler, A., Plessen, B., Robinson, R., Rosenthal, Y., and Haug, G.: Foraminiferal isotope evidence of reduced nitrogen fixation in the ice age Atlantic Ocean, *Science*, 323, 244-248, <https://doi.org/10.1126/science.1165787>, 2009.
- Ren, H., Sigman, D. M., Martínez-García, A., Anderson, R. F., Chen, M.-T., Ravelo, A. C., Straub, M., Wong, G. T., and Haug, G. H.: Impact of glacial/interglacial sea level change on the ocean nitrogen cycle, *Proceedings of the National Academy of Sciences*, 114, E6759-E6766, <https://doi.org/10.1073/pnas.1701315114>, 2017.
- 730 Ren, H., Studer, A. S., Serno, S., Sigman, D. M., Winckler, G., Anderson, R. F., Oleynik, S., Gersonde, R., and Haug, G. H.: Glacial-to-interglacial changes in nitrate supply and consumption in the subarctic North Pacific from microfossil-bound N isotopes at two trophic levels, *Paleoceanography*, 30, 1217-1232, 2015.
- 735 Repschläger, J., Auderset, A., Blanz, T., Bremer, K., Böttner, C., Eich, C., Kausch, T., Keigwin, L. D., Keul, N., and Kiefer, J.: North Atlantic Subtropical Gyre Azores Front (NASGAF), Cruise No. MSM58/1, September 10, 2016-October 7, 2016, Reykjavik (Iceland)-Ponta Delgada (Azores, Portugal), 2018.
- Reynolds, C. E., Richey, J. N., Fehrenbacher, J. S., Rosenheim, B. E., and Spero, H. J.: Environmental controls on the geochemistry of *Globorotalia truncatulinoides* in the Gulf of Mexico: Implications for paleoceanographic reconstructions, *Marine Micropaleontology*, 142, 92-104, 2018.
- 740 Robinson, R. S., Brunelle, B. G., and Sigman, D. M.: Revisiting nutrient utilization in the glacial Antarctic: Evidence from a new method for diatom-bound N isotopic analysis, *Paleoceanography*, 19, 2004.
- Robinson, R. S., Kienast, M., Luiza Albuquerque, A., Altabet, M., Contreras, S., De Pol Holz, R., Dubois, N., Francois, R., Galbraith, E., and Hsu, T. C.: A review of nitrogen isotopic alteration in marine sediments, *Paleoceanography*, 27, 2012.
- Sarmiento, J. L. and Gruber, N.: *Ocean Biogeochemical Dynamics*, Princeton University Press, 10.2307/j.ctt3fgxqx, 2006.
- 745 Schiebel, R. and Hemleben, C.: *Planktic foraminifers in the modern ocean*, Springer, 2017.
- Schiebel, R., Hiller, B., and Hemleben, C.: Impacts of storms on recent planktic foraminiferal test production and  $\text{CaCO}_3$  flux in the North Atlantic at 47 N, 20 W (JGOFS), *Marine Micropaleontology*, 26, 115-129, 1995.
- Schiebel, R., Wanick, J., Bork, M., and Hemleben, C.: Planktic foraminiferal production stimulated by chlorophyll redistribution and entrainment of nutrients, *Deep Sea Research Part I: Oceanographic Research Papers*, 48, 721-740, 2001.
- 750 Schiebel, R., Smart, S. M., Jentzen, A., Jonkers, L., Morard, R., Meilland, J., Michel, E., Coxall, H. K., Hull, P. M., and de Garidel-Thoron, T.: Advances in planktonic foraminifer research: New perspectives for paleoceanography, *Revue de Micropaleontologie*, 61, 113-138, 2018.





- Schlitzer, R.: Ocean data view, 2015.
- Schmid, C., Siedler, G., and Zenk, W.: Dynamics of intermediate water circulation in the subtropical South Atlantic, *Journal of Physical Oceanography*, 30, 3191-3211, 2000.
- 755 Schmitz Jr., W. J. and McCartney, M. S.: On the North Atlantic Circulation, *Reviews of Geophysics*, 31, 29-49, <https://doi.org/10.1029/92RG02583>, 1993.
- Schubert, C. J. and Calvert, S. E.: Nitrogen and carbon isotopic composition of marine and terrestrial organic matter in Arctic Ocean sediments: implications for nutrient utilization and organic matter composition, *Deep Sea Research Part I: Oceanographic Research Papers*, 48, 789-810, [https://doi.org/10.1016/S0967-0637\(00\)00069-8](https://doi.org/10.1016/S0967-0637(00)00069-8), 2001.
- 760 Shaw, J. O., D'haenens, S., Thomas, E., Norris, R. D., Lyman, J. A., Bornemann, A., and Hull, P. M.: Photosymbiosis in planktonic foraminifera across the Paleocene–Eocene thermal maximum, *Paleobiology*, 47, 632-647, 2021.
- Siccha, M., Morard, R., and Kucera, M.: Processed multinet CTD data from METEOR cruise M124, PANGAEA [dataset], 10.1594/PANGAEA.895426, 2018.
- 765 Sigman, D., Casciotti, K., Andreani, M., Barford, C., Galanter, M., and Böhlke, J.: A bacterial method for the nitrogen isotopic analysis of nitrate in seawater and freshwater, *Analytical chemistry*, 73, 4145-4153, <https://doi.org/10.1021/ac010088e>, 2001.
- Sigman, D. M., Altabet, M., McCorkle, D., Francois, R., and Fischer, G.: The  $\delta^{15}\text{N}$  of nitrate in the Southern Ocean: Nitrogen cycling and circulation in the ocean interior, *Journal of Geophysical Research: Oceans*, 105, 19599-19614, 2000.
- 770 Sigman, D. M., Altabet, M. A., Francois, R., McCorkle, D. C., and Gaillard, J. F.: The isotopic composition of diatom-bound nitrogen in Southern Ocean sediments, *Paleoceanography*, 14, 118-134, 1999.
- Silfer, J., Engel, M., and Macko, S.: Kinetic fractionation of stable carbon and nitrogen isotopes during peptide bond hydrolysis: experimental evidence and geochemical implications, *Chemical Geology: Isotope Geoscience section*, 101, 211-221, 1992.
- 775 Smart, S. M., Fawcett, S. E., Thomalla, S. J., Weigand, M. A., Reason, C. J., and Sigman, D. M.: Isotopic evidence for nitrification in the Antarctic winter mixed layer, *Global Biogeochemical Cycles*, 29, 427-445, 2015.
- Smart, S. M., Fawcett, S. E., Ren, H., Schiebel, R., Tompkins, E. M., Martínez-García, A., Stirnimann, L., Roychoudhury, A., Haug, G. H., and Sigman, D. M.: The nitrogen isotopic composition of tissue and shell-bound organic matter of planktic foraminifera in Southern Ocean surface waters, *Geochemistry, Geophysics, Geosystems*, 21, e2019GC008440, 2020.
- 780 Smart, S. M., Ren, H., Fawcett, S. E., Schiebel, R., Conte, M., Rafter, P. A., Ellis, K. K., Weigand, M. A., Oleynik, S., Haug, G. H., and Sigman, D. M.: Ground-truthing the planktic foraminifer-bound nitrogen isotope paleo-proxy in the Sargasso Sea, *Geochim Cosmochim Acta*, 235, 463-482, <https://doi.org/10.1016/j.gca.2018.05.023>, 2018.
- Spero, H. and Williams, D.: Opening the carbon isotope “vital effect” black box I. Seasonal temperatures in the euphotic zone, *Paleoceanography*, 4, 593-601, 1989.
- 785 Spero, H. J. and Deniro, M. J.: The influence of symbiont photosynthesis on the  $\delta^{18}\text{O}$  and  $\delta^{13}\text{C}$  values of planktonic foraminiferal shell calcite, *Symbiosis*, 1987.
- Spero, H. J. and Lea, D. W.: Experimental determination of stable isotope variability in *Globigerina bulloides*: implications for paleoceanographic reconstructions, *Marine Micropaleontology*, 28, 231-246, 1996.
- Spero, H. J., Lerche, I., and Williams, D. F.: Opening the carbon isotope “vital effect” black box, 2, Quantitative model for interpreting foraminiferal carbon isotope data, *Paleoceanography*, 6, 639-655, 1991.
- 790 Spero, H. J., Bijma, J., Lea, D. W., and Bemis, B. E.: Effect of seawater carbonate concentration on foraminiferal carbon and oxygen isotopes, *Nature*, 390, 497-500, 1997.
- Spindler, M., Hemleben, C., Salomons, J., and Smit, L.: Feeding behavior of some planktonic foraminifera in laboratory cultures, *The Journal of Foraminiferal Research*, 14, 237-249, 1984.
- 795 Steinberg, D. K., Carlson, C. A., Bates, N. R., Johnson, R. J., Michaels, A. F., and Knap, A. H.: Overview of the US JGOFS Bermuda Atlantic Time-series Study (BATS): a decade-scale look at ocean biology and biogeochemistry, *Deep Sea Research Part II: Topical Studies in Oceanography*, 48, 1405-1447, 2001.
- Stramma, L.: Geostrophic transport of the South Equatorial Current in the Atlantic, *Journal of Marine Research*, 49, 281-294, 1991.
- 800 Straub, M., Sigman, D. M., Ren, H., Martínez-García, A., Meckler, A. N., Hain, M. P., and Haug, G. H.: Changes in North Atlantic nitrogen fixation controlled by ocean circulation, *Nature*, 501, 200, <https://doi.org/10.1038/nature12397>, 2013.



- Takagi, H., Kimoto, K., Fujiki, T., Saito, H., Schmidt, C., Kucera, M., and Moriya, K.: Characterizing photosymbiosis in modern planktonic foraminifera, *Biogeosciences*, 16, 2019.
- 805 Wang, X., Sigman, D. M., Cohen, A., Sinclair, D., Sherrell, R., Weigand, M., Erler, D. V., and Ren, H.: Isotopic composition of skeleton-bound organic nitrogen in reef-building symbiotic corals: A new method and proxy evaluation at Bermuda, *Geochim Cosmochim Acta*, 148, 179-190, 2015.
- Wang, X. T., Prokopenko, M. G., Sigman, D. M., Adkins, J. F., Robinson, L. F., Ren, H., Oleynik, S., Williams, B., and Haug, G. H.: Isotopic composition of carbonate-bound organic nitrogen in deep-sea scleractinian corals: A new window into past biogeochemical change, *Earth Planet Sc Lett*, 400, 243-250, 2014.
- 810 Wang, X. T., Wang, Y., Auderset, A., Sigman, D. M., Ren, H., Martínez-García, A., Haug, G. H., Su, Z., Zhang, Y. G., and Rasmussen, B.: Oceanic nutrient rise and the late Miocene inception of Pacific oxygen-deficient zones, *Proceedings of the National Academy of Sciences*, 119, e2204986119, 2022.
- Wefer, G., Berger, W. H., Siedler, G., Webb, D. J., and Reid, J.: On the circulation of the South Atlantic Ocean, *The South Atlantic: present and past circulation*, 13-44, 1996.
- 815 Weigand, M. A., Foriel, J., Barnett, B., Oleynik, S., and Sigman, D. M.: Updates to instrumentation and protocols for isotopic analysis of nitrate by the denitrifier method, *Rapid Communications in Mass Spectrometry*, 30, 1365-1383, <https://doi.org/10.1002/rcm.7570>, 2016.
- Yoshikawa, C., Makabe, A., Shiozaki, T., Toyoda, S., Yoshida, O., Furuya, K., and Yoshida, N.: Nitrogen isotope ratios of nitrate and N\* anomalies in the subtropical South Pacific, *Geochemistry, Geophysics, Geosystems*, 16, 1439-1448, 2015.
